# Supplementary material for: The associations between asthma and common comorbidities: a comprehensive Mendelian randomization study
Source: Front Med (Lausanne). 2023 Nov 15;10:1251827. doi: 10.3389/fmed.2023.1251827 (PMC10684927; doi:10.3389/fmed.2023.1251827)
Supplement: Supplementary file 2 [file Table_2.xlsx]

## Sheet: UKBB
Trait	SNP	Effect allele	Other allele	Effect allele frequency	Beta	Standard error	P-value	F -statistic
Obstructive sleep apnea	rs10507084	T	C	0.179114	0.0612998	0.0107405	1.14728e-08	32.5739
Obstructive sleep apnea	rs10986730	T	C	0.524315	-0.0535385	0.00827592	9.85372e-11	41.8504
Obstructive sleep apnea	rs11075985	A	C	0.428618	0.0856056	0.00830772	6.73442e-25	106.179
Obstructive sleep apnea	rs113955098	A	G	0.0674583	-0.0953504	0.0170317	2.16337e-08	31.3422
Obstructive sleep apnea	rs11981973	G	A	0.181564	0.0631996	0.0105931	2.42935e-09	35.5945
Obstructive sleep apnea	rs12511115	C	G	0.295671	0.0539721	0.00906817	2.6518e-09	35.4241
Obstructive sleep apnea	rs12788184	G	A	0.477137	0.0508858	0.00828325	8.08649e-10	37.7391
Obstructive sleep apnea	rs140896965	T	C	0.0490372	-0.111452	0.0198799	2.06728e-08	31.4302
Obstructive sleep apnea	rs59333125	C	A	0.080582	-0.0898793	0.015499	6.6696e-09	33.6288
Obstructive sleep apnea	rs742760	T	A	0.163013	-0.0638305	0.0113047	1.6387e-08	31.8815
Obstructive sleep apnea	rs76229479	C	A	0.0987328	-0.0770994	0.0140991	4.54119e-08	29.9033
Obstructive sleep apnea	rs78549563	A	G	0.136301	-0.0668568	0.0122394	4.69656e-08	29.8381
Obstructive sleep apnea	rs9551988	T	C	0.0764815	0.0854277	0.0152766	2.24388e-08	31.2712
Chronic obstructive pulmonary disease	rs113623975	G	A	0.0997693	-0.132178	0.0204596	1.04402e-10	41.7373
Chronic obstructive pulmonary disease	rs143031266	G	A	0.0387407	0.164683	0.0296348	2.74347e-08	30.8812
Chronic obstructive pulmonary disease	rs2273500	C	T	0.217016	0.0951338	0.0142143	2.18927e-11	44.7939
Chronic obstructive pulmonary disease	rs28929474	T	C	0.0197308	0.348685	0.0392862	6.96145e-19	78.7747
Chronic obstructive pulmonary disease	rs2904259	C	T	0.503937	0.0664499	0.0118358	1.97329e-08	31.5205
Chronic obstructive pulmonary disease	rs66694560	A	G	0.356844	0.0763852	0.0122937	5.18693e-10	38.6059
Chronic obstructive pulmonary disease	rs708461	C	G	0.205528	0.0885784	0.0144533	8.86625e-10	37.5597
Chronic obstructive pulmonary disease	rs8040868	C	T	0.379013	0.190563	0.012021	1.35021e-56	251.302
Chronic obstructive pulmonary disease	rs9270664	A	G	0.514181	0.067614	0.0118783	1.25406e-08	32.4015
Chronic sinusitis	rs12413578	T	C	0.058288	-0.151341	0.0267976	1.6272e-08	31.8949
Chronic sinusitis	rs1391373	C	T	0.414399	0.130092	0.0121679	1.11635e-26	114.306
Chronic sinusitis	rs150649674	C	A	0.042593	0.159985	0.0289996	3.45239e-08	30.4351
Chronic sinusitis	rs2079672	A	G	0.604735	-0.0698173	0.012364	1.63463e-08	31.8866
Chronic sinusitis	rs2095044	C	T	0.761308	-0.149344	0.013802	2.75423e-27	117.082
Chronic sinusitis	rs2180961	A	T	0.164797	0.0941354	0.0159774	3.82067e-09	34.7131
Chronic sinusitis	rs281379	A	G	0.407632	0.0869218	0.0122001	1.04328e-12	50.7611
Chronic sinusitis	rs3184504	C	T	0.592326	-0.0711417	0.012229	5.97475e-09	33.8428
Chronic sinusitis	rs3744374	A	G	0.229852	-0.0890069	0.0145415	9.30593e-10	37.4653
Chronic sinusitis	rs3821204	G	C	0.273081	0.0754188	0.0133909	1.78037e-08	31.7205
Chronic sinusitis	rs4418728	T	G	0.470576	0.0662375	0.0120564	3.92961e-08	30.1837
Chronic sinusitis	rs4803791	A	G	0.302483	-0.0733512	0.0133487	3.9067e-08	30.1951
Chronic sinusitis	rs6889889	A	G	0.300898	0.120563	0.0129591	1.36082e-20	86.5523
Chronic sinusitis	rs6967330	A	G	0.267537	0.075672	0.0135749	2.48405e-08	31.074
Chronic sinusitis	rs72800849	A	C	0.220666	-0.0807086	0.0147213	4.19488e-08	30.0571
Chronic sinusitis	rs748660	G	C	0.394556	-0.0845011	0.012416	1.00462e-11	46.3192
Chronic sinusitis	rs7745002	G	A	0.449436	0.0899811	0.0120709	9.03025e-14	55.5678
Atopic dermatitis	rs10211029	G	A	0.240847	0.0865983	0.0154462	2.06538e-08	31.4322
Atopic dermatitis	rs1026788	C	T	0.559611	0.0987814	0.0135073	2.60916e-13	53.4827
Atopic dermatitis	rs11057275	T	C	0.676554	0.0789461	0.0143899	4.10658e-08	30.0986
Atopic dermatitis	rs112502960	A	G	0.42558	0.10914	0.0133943	3.69233e-16	66.3939
Atopic dermatitis	rs11265443	A	G	0.53176	-0.0735008	0.0134063	4.19199e-08	30.0584
Atopic dermatitis	rs113399573	T	C	0.276747	-0.128986	0.015154	1.71435e-17	72.4487
Atopic dermatitis	rs11580042	C	T	0.434375	0.0941788	0.0135063	3.10313e-12	48.6221
Atopic dermatitis	rs11631770	C	T	0.350815	0.0771243	0.0138751	2.72132e-08	30.8966
Atopic dermatitis	rs11645657	G	C	0.467262	-0.0769706	0.0134528	1.0556e-08	32.7359
Atopic dermatitis	rs117137535	A	G	0.0392552	0.251865	0.0323174	6.51929e-15	60.7383
Atopic dermatitis	rs12123821	T	C	0.0389932	0.329804	0.0314073	8.55658e-26	110.268
Atopic dermatitis	rs12789913	C	T	0.122412	-0.157633	0.0210301	6.59933e-14	56.1839
Atopic dermatitis	rs141945528	C	A	0.00715507	0.427953	0.0702631	1.12406e-09	37.0969
Atopic dermatitis	rs16903574	G	C	0.127211	0.124233	0.019596	2.30187e-10	40.192
Atopic dermatitis	rs2021716	T	C	0.23916	-0.111881	0.0158918	1.91955e-12	49.564
Atopic dermatitis	rs2075580	C	G	0.626078	0.080455	0.0138911	6.96274e-09	33.5454
Atopic dermatitis	rs2272129	T	C	0.809627	-0.135223	0.0166167	4.02624e-16	66.2234
Atopic dermatitis	rs2944540	C	T	0.502251	0.0732093	0.0133919	4.58575e-08	29.8846
Atopic dermatitis	rs2967676	C	A	0.220463	0.102317	0.0158849	1.18596e-10	41.4884
Atopic dermatitis	rs35160546	T	C	0.355599	-0.0804928	0.0140305	9.6374e-09	32.913
Atopic dermatitis	rs35570272	T	G	0.355976	0.0829543	0.0138665	2.19923e-09	35.7885
Atopic dermatitis	rs35870054	G	T	0.0915837	-0.179864	0.0240971	8.38494e-14	55.7133
Atopic dermatitis	rs4739735	T	C	0.654117	-0.0873972	0.0139187	3.40534e-10	39.4274
Atopic dermatitis	rs479844	G	A	0.588055	0.104935	0.0136715	1.64816e-14	58.9126
Atopic dermatitis	rs56094005	G	A	0.0468817	-0.190179	0.0335529	1.44451e-08	32.1266
Atopic dermatitis	rs6062490	C	G	0.809816	0.158454	0.0175272	1.56063e-19	81.73
Atopic dermatitis	rs61815559	T	A	0.00786229	0.429732	0.0676197	2.08243e-10	40.3877
Atopic dermatitis	rs61839660	T	C	0.0406956	0.194043	0.0322909	1.86419e-09	36.1107
Atopic dermatitis	rs61926947	T	C	0.190031	0.0937009	0.0168212	2.5415e-08	31.0294
Atopic dermatitis	rs67727847	C	G	0.344682	0.0846302	0.0141228	2.06709e-09	35.9095
Atopic dermatitis	rs6796	C	T	0.320194	-0.0803763	0.0144825	2.85858e-08	30.8013
Atopic dermatitis	rs723590	G	A	0.773343	0.0939249	0.0161823	6.46785e-09	33.6884
Atopic dermatitis	rs72981698	T	C	0.183472	-0.103827	0.0175787	3.49639e-09	34.8857
Atopic dermatitis	rs73018933	A	G	0.24729	-0.0961922	0.0157474	1.00612e-09	37.3132
Atopic dermatitis	rs7688384	T	C	0.312498	-0.105294	0.0145844	5.21315e-13	52.1231
Atopic dermatitis	rs7714574	T	C	0.510116	0.082154	0.0133972	8.66942e-10	37.6036
Atopic dermatitis	rs77531520	T	C	0.0686341	0.218034	0.0247651	1.31947e-18	77.5119
Atopic dermatitis	rs7930490	G	C	0.421525	-0.0857344	0.0136041	2.93623e-10	39.7165
Atopic dermatitis	rs7936070	T	G	0.413938	0.142858	0.0134297	1.9948e-26	113.156
Atopic dermatitis	rs79754360	G	A	0.121481	-0.126542	0.0210065	1.702e-09	36.2879
Atopic dermatitis	rs8108687	G	A	0.723986	0.0842698	0.0151792	2.82976e-08	30.821
Atopic dermatitis	rs847	C	T	0.635204	-0.134551	0.0137676	1.47062e-22	95.5119
Atopic dermatitis	rs9277629	T	C	0.0768087	-0.149495	0.0261967	1.15226e-08	32.5657
Atopic dermatitis	rs943451	C	T	0.698132	-0.0853617	0.0145037	3.9678e-09	34.6393
Allergic conjunctivitis	rs12736147	T	C	0.0654904	0.117671	0.0214541	4.13962e-08	30.0828
Allergic conjunctivitis	rs17205184	A	G	0.293526	-0.0714883	0.0120029	2.58607e-09	35.473
Allergic conjunctivitis	rs17616434	C	T	0.138229	-0.125358	0.0163489	1.75146e-14	58.7932
Allergic conjunctivitis	rs2001628	A	G	0.655258	-0.0645329	0.0113574	1.33116e-08	32.2853
Allergic conjunctivitis	rs2766680	A	G	0.80928	-0.0809608	0.0137954	4.39329e-09	34.4414
Allergic conjunctivitis	rs34290285	A	G	0.217007	-0.0770198	0.0133239	7.44509e-09	33.415
Allergic conjunctivitis	rs4945087	A	G	0.394566	-0.0696063	0.0111227	3.89861e-10	39.1631
Allergic conjunctivitis	rs72823641	A	T	0.158638	-0.11796	0.0151631	7.28786e-15	60.5192
Allergic conjunctivitis	rs73390208	T	C	0.306945	-0.0651543	0.0118843	4.19662e-08	30.0565
Allergic conjunctivitis	rs74541740	A	G	0.171409	-0.0937924	0.0147121	1.8276e-10	40.643
Allergic rhinitis	rs10032644	A	T	0.479752	-0.0864904	0.0147288	4.30061e-09	34.4827
Allergic rhinitis	rs10786678	T	C	0.416616	0.0873412	0.014814	3.72726e-09	34.7611
Allergic rhinitis	rs11936050	T	C	0.127578	-0.148114	0.0230437	1.297e-10	41.3131
Allergic rhinitis	rs12676007	A	G	0.442873	0.0872819	0.0149133	4.83905e-09	34.2532
Allergic rhinitis	rs12789913	C	T	0.122575	-0.125172	0.0229206	4.73151e-08	29.8238
Allergic rhinitis	rs1438673	T	C	0.552271	-0.110657	0.0147225	5.63897e-14	56.493
Allergic rhinitis	rs185652639	G	C	0.0391502	0.200521	0.0362045	3.04993e-08	30.6757
Allergic rhinitis	rs3135041	G	A	0.302332	0.0959522	0.0158496	1.41358e-09	36.6499
Allergic rhinitis	rs7503709	T	C	0.410359	0.0817695	0.0149347	4.3717e-08	29.9771
Allergic rhinitis	rs7936312	T	G	0.413867	0.10597	0.0148121	8.41008e-13	51.1838
Allergic urticaria	rs10819528	G	A	0.261279	0.156743	0.0343002	4.88292e-06	20.8825
Allergic urticaria	rs10892629	T	C	0.136712	0.24997	0.0420693	2.81786e-09	35.3057
Allergic urticaria	rs11141660	T	C	0.0437576	0.31168	0.0684036	5.20176e-06	20.7616
Allergic urticaria	rs112495209	A	G	0.0161967	-0.674385	0.152404	9.64451e-06	19.5805
Allergic urticaria	rs112581260	T	C	0.0219676	0.421615	0.094268	7.73036e-06	20.0034
Allergic urticaria	rs112986307	A	G	0.0170838	-0.763976	0.151543	4.62338e-07	25.4149
Allergic urticaria	rs141915605	C	T	0.0350658	0.352245	0.0761336	3.71595e-06	21.4061
Allergic urticaria	rs3093988	A	G	0.136395	0.232323	0.0423787	4.20368e-08	30.0531
Allergic urticaria	rs6693435	A	G	0.274826	0.15139	0.0340453	8.71846e-06	19.7733
Allergic urticaria	rs7302657	T	A	0.822103	0.189812	0.0418861	5.85315e-06	20.5356
Allergic urticaria	rs75330214	T	C	0.0456631	-0.391579	0.0824453	2.03864e-06	22.5583
Allergic urticaria	rs76894643	A	C	0.0186448	0.445799	0.0991398	6.90256e-06	20.22
Allergic urticaria	rs76930381	A	G	0.0179386	0.473204	0.0996677	2.05627e-06	22.5418
Allergic urticaria	rs78048479	T	C	0.0440255	0.325398	0.0687772	2.23203e-06	22.3842
Allergic urticaria	rs78780266	T	C	0.101647	-0.266952	0.0556791	1.6311e-06	22.987
Allergic urticaria	rs793489	T	G	0.701734	-0.156738	0.0329009	1.89837e-06	22.6951
Hypertension	rs10041624	A	T	0.245327	-0.0478438	0.00707796	1.3842e-11	45.6915
Hypertension	rs10059884	A	C	0.586123	0.0570054	0.00616237	2.23306e-20	85.5729
Hypertension	rs10077410	A	G	0.22586	0.0461506	0.00724122	1.84982e-10	40.6192
Hypertension	rs1017415	G	A	0.353719	0.0350367	0.00639285	4.23877e-08	30.0371
Hypertension	rs10185395	T	G	0.242487	0.0440632	0.00709978	5.42525e-10	38.5179
Hypertension	rs10206833	A	G	0.865856	-0.0567956	0.00888598	1.64169e-10	40.8525
Hypertension	rs10217559	T	C	0.693589	0.0459611	0.00661017	3.57355e-12	48.3454
Hypertension	rs1023761	C	G	0.686703	0.0399386	0.00656819	1.19729e-09	36.9738
Hypertension	rs10253736	T	C	0.231985	0.043993	0.00722614	1.14304e-09	37.0642
Hypertension	rs10776752	T	G	0.170029	0.108986	0.00806746	1.37689e-41	182.502
Hypertension	rs10786736	C	G	0.091611	-0.095944	0.0105895	1.30077e-19	82.089
Hypertension	rs10995445	T	A	0.511346	-0.0346868	0.00609507	1.26328e-08	32.387
Hypertension	rs11075985	A	C	0.428592	0.0579625	0.00613055	3.23966e-21	89.3913
Hypertension	rs11084946	C	T	0.883986	0.055535	0.00962079	7.81502e-09	33.3205
Hypertension	rs111283598	A	G	0.0980246	0.0577026	0.0102324	1.70856e-08	31.8006
Hypertension	rs11563570	T	C	0.034818	0.0947918	0.0165203	9.58672e-09	32.9235
Hypertension	rs11608	A	G	0.731897	0.0400439	0.00688465	6.01312e-09	33.8305
Hypertension	rs11655239	A	G	0.142559	-0.0505711	0.00877161	8.15061e-09	33.2389
Hypertension	rs117185762	T	C	0.0459485	-0.0981998	0.0146573	2.08833e-11	44.8862
Hypertension	rs11973114	A	G	0.241062	-0.0447974	0.00712511	3.23125e-10	39.5296
Hypertension	rs12050481	C	T	0.646319	0.0381765	0.0063687	2.04258e-09	35.9328
Hypertension	rs1214761	G	A	0.69529	-0.0523187	0.00657977	1.84332e-15	63.2255
Hypertension	rs12481717	A	G	0.194237	0.0425629	0.00771579	3.46155e-08	30.43
Hypertension	rs12509595	C	T	0.31449	0.0924866	0.00656499	4.51024e-45	198.468
Hypertension	rs12599980	T	C	0.379537	-0.0403666	0.00628195	1.31172e-10	41.291
Hypertension	rs1265002	T	A	0.953075	-0.0978642	0.0142968	7.6366e-12	46.8565
Hypertension	rs12728091	T	A	0.0771345	0.0714508	0.0113776	3.38719e-10	39.4378
Hypertension	rs12749040	A	G	0.0814542	0.0695641	0.0110762	3.37443e-10	39.4447
Hypertension	rs1274960	C	T	0.454601	-0.0365909	0.00610865	2.09831e-09	35.8803
Hypertension	rs1275977	A	G	0.593923	-0.0819603	0.00618817	4.84395e-40	175.421
Hypertension	rs13062241	T	C	0.528073	-0.0408812	0.00608772	1.87629e-11	45.096
Hypertension	rs1308020	A	G	0.282534	-0.0415879	0.00678324	8.73394e-10	37.5889
Hypertension	rs13112725	C	G	0.828433	0.0517004	0.00812605	1.98747e-10	40.4789
Hypertension	rs1317181	T	G	0.209328	0.0631568	0.00746028	2.54507e-17	71.6688
Hypertension	rs13329952	C	T	0.233531	-0.0434295	0.00720936	1.70114e-09	36.2891
Hypertension	rs13346655	G	C	0.217794	0.0515957	0.00733728	2.0361e-12	49.4489
Hypertension	rs13386034	C	T	0.238376	0.0391639	0.00714636	4.24688e-08	30.0332
Hypertension	rs1363561	G	A	0.541552	-0.0340025	0.00609851	2.46763e-08	31.0867
Hypertension	rs140503338	G	T	0.0409616	0.0850994	0.0152558	2.43075e-08	31.1159
Hypertension	rs143439093	G	A	0.0753004	-0.110947	0.0117496	3.6358e-21	89.1631
Hypertension	rs143466522	A	G	0.0145401	0.162924	0.0252561	1.11209e-10	41.6138
Hypertension	rs1447610	C	T	0.267909	-0.0386889	0.00691727	2.23064e-08	31.2826
Hypertension	rs146781867	A	G	0.135596	0.0574685	0.00891052	1.1221e-10	41.5962
Hypertension	rs147222641	A	G	0.0620491	-0.0703922	0.0127549	3.41295e-08	30.4575
Hypertension	rs1515114	G	A	0.42904	0.0338366	0.00615708	3.89466e-08	30.2012
Hypertension	rs1517287	G	A	0.827353	-0.0454786	0.00802909	1.4769e-08	32.0835
Hypertension	rs1555959	G	T	0.255582	0.0537138	0.00697456	1.34586e-14	59.3114
Hypertension	rs167479	G	T	0.575586	0.0753091	0.00617738	3.46657e-34	148.623
Hypertension	rs17080102	C	G	0.0761537	-0.110794	0.0115283	7.21274e-22	92.3638
Hypertension	rs1745414	A	T	0.565367	0.0367631	0.00613269	2.03976e-09	35.9354
Hypertension	rs1836039	G	A	0.148849	-0.0502246	0.00856692	4.55617e-09	34.3703
Hypertension	rs1879053	C	T	0.548086	-0.0472325	0.00611277	1.1023e-14	59.7043
Hypertension	rs188155432	T	C	0.0238709	0.138554	0.0198765	3.1521e-12	48.5913
Hypertension	rs1888693	A	G	0.385231	0.0504227	0.0062452	6.81397e-16	65.1868
Hypertension	rs1980235	A	G	0.754109	0.0649298	0.00709883	5.8776e-20	83.6594
Hypertension	rs198645	T	A	0.332772	-0.0359693	0.00646335	2.61963e-08	30.9705
Hypertension	rs198846	G	A	0.88889	-0.06553	0.00963144	1.0193e-11	46.2911
Hypertension	rs2023844	A	G	0.904421	0.127372	0.0105163	9.13903e-34	146.697
Hypertension	rs2063123	C	T	0.410665	0.0469727	0.00617485	2.80285e-14	57.868
Hypertension	rs2073428	G	T	0.393378	0.0365856	0.00622678	4.21502e-09	34.5218
Hypertension	rs2230738	T	C	0.309993	0.0416624	0.00659769	2.70695e-10	39.8754
Hypertension	rs2274224	C	G	0.345265	-0.050829	0.00641472	2.30356e-15	62.7867
Hypertension	rs2286526	T	C	0.713366	0.0557217	0.00673785	1.33999e-16	68.3921
Hypertension	rs2293059	A	G	0.0750896	-0.0703953	0.0115993	1.28754e-09	36.8319
Hypertension	rs2351013	G	A	0.80766	0.0596691	0.00775786	1.45479e-14	59.1582
Hypertension	rs2392929	G	T	0.296798	0.0530729	0.00664738	1.41645e-15	63.7448
Hypertension	rs2447607	T	C	0.570986	0.0354474	0.00615104	8.27142e-09	33.2102
Hypertension	rs2465276	A	G	0.126965	0.0585872	0.00911038	1.26917e-10	41.3554
Hypertension	rs2493292	T	C	0.109453	0.0558539	0.00970459	8.64331e-09	33.1248
Hypertension	rs2515236	G	A	0.391412	0.0366092	0.00621841	3.92735e-09	34.6595
Hypertension	rs252011	T	G	0.537164	-0.0333635	0.00609546	4.41205e-08	29.9592
Hypertension	rs2525757	G	A	0.536048	0.041388	0.00613229	1.48662e-11	45.5516
Hypertension	rs2585810	A	G	0.427522	0.0367877	0.00614206	2.10523e-09	35.8738
Hypertension	rs2627319	T	C	0.40635	0.0450161	0.00619723	3.76097e-13	52.7643
Hypertension	rs2643826	T	C	0.404534	0.0504807	0.00620122	3.93822e-16	66.2669
Hypertension	rs2782980	C	T	0.654327	0.0643114	0.00641583	1.19729e-23	100.478
Hypertension	rs2980755	G	A	0.531028	0.0452027	0.00614942	1.97151e-13	54.0332
Hypertension	rs303948	G	A	0.100222	0.0594028	0.0100974	4.0294e-09	34.6095
Hypertension	rs3101436	G	A	0.649811	-0.0357621	0.00637009	1.97629e-08	31.5177
Hypertension	rs3131004	G	A	0.450672	0.0440336	0.00611709	6.08976e-13	51.8178
Hypertension	rs35198836	T	C	0.321016	0.0384149	0.0065113	3.64125e-09	34.8068
Hypertension	rs35427	G	T	0.365799	-0.0560759	0.00636656	1.27526e-18	77.5788
Hypertension	rs35783704	A	G	0.155019	-0.059811	0.00844461	1.41319e-12	50.1652
Hypertension	rs3749981	T	C	0.105291	0.0549072	0.00989591	2.88164e-08	30.7856
Hypertension	rs3802228	G	A	0.568909	-0.0392171	0.00613925	1.68151e-10	40.8057
Hypertension	rs3821843	A	G	0.660465	0.0398081	0.00648848	8.50589e-10	37.6406
Hypertension	rs3825566	T	C	0.693053	0.0396885	0.00661682	1.99614e-09	35.9775
Hypertension	rs3918226	T	C	0.0697548	0.15294	0.0118087	2.30462e-38	167.741
Hypertension	rs3993747	G	A	0.32017	0.0405787	0.0065153	4.71791e-10	38.7907
Hypertension	rs4320727	A	G	0.626301	0.0374171	0.00629737	2.82085e-09	35.3038
Hypertension	rs4371736	C	G	0.382474	-0.0461155	0.00625687	1.70137e-13	54.3225
Hypertension	rs45474499	T	C	0.0624049	0.0747051	0.0125231	2.44045e-09	35.5858
Hypertension	rs4599004	T	C	0.286105	-0.0412652	0.00675574	1.00774e-09	37.3097
Hypertension	rs4660877	T	C	0.23837	0.0448591	0.00714191	3.36179e-10	39.4523
Hypertension	rs4724960	G	A	0.43999	0.033953	0.00611693	2.8459e-08	30.8098
Hypertension	rs4832768	G	A	0.579151	-0.0370205	0.00618822	2.19857e-09	35.7893
Hypertension	rs507446	T	C	0.580294	0.0427625	0.00617935	4.50921e-12	47.8895
Hypertension	rs529373	T	C	0.252195	0.038237	0.00697665	4.23643e-08	30.0382
Hypertension	rs5418	A	G	0.6025	0.0512333	0.00621568	1.68539e-16	67.9403
Hypertension	rs57274670	C	G	0.264913	-0.0433766	0.00691537	3.5532e-10	39.3442
Hypertension	rs57541197	A	G	0.102116	-0.0720384	0.010082	8.98256e-13	51.0546
Hypertension	rs5762855	T	A	0.203594	0.0514095	0.0075399	9.21086e-12	46.4896
Hypertension	rs58236662	C	G	0.451401	-0.0356542	0.00611708	5.58818e-09	33.9729
Hypertension	rs5994376	C	A	0.538353	0.0380294	0.00610343	4.63981e-10	38.8232
Hypertension	rs6026578	G	C	0.647864	0.0364086	0.00637253	1.10757e-08	32.6426
Hypertension	rs604723	C	T	0.741215	0.0665301	0.0069562	1.13136e-21	91.4729
Hypertension	rs60595656	C	T	0.685261	-0.0416468	0.00657598	2.40182e-10	40.109
Hypertension	rs60776549	G	A	0.276082	0.0406671	0.00678108	2.00817e-09	35.9657
Hypertension	rs6227	T	C	0.267957	0.0756758	0.0068636	2.87409e-28	121.565
Hypertension	rs62294340	A	G	0.279758	-0.0376063	0.00680808	3.31787e-08	30.5121
Hypertension	rs62426324	T	C	0.499642	0.0534486	0.00608832	1.6512e-18	77.0686
Hypertension	rs6271	T	C	0.0671933	-0.0759296	0.0122723	6.13028e-10	38.2799
Hypertension	rs6441206	A	G	0.444897	0.0380401	0.00611567	4.96833e-10	38.6897
Hypertension	rs6488548	A	C	0.535958	-0.0432559	0.00613324	1.75509e-12	49.7406
Hypertension	rs6490022	C	T	0.69296	0.0505876	0.00660295	1.83992e-14	58.6965
Hypertension	rs6588636	C	T	0.444872	0.0369947	0.00611379	1.43926e-09	36.6149
Hypertension	rs66794444	T	C	0.107891	0.0575484	0.00977914	3.98511e-09	34.631
Hypertension	rs67227401	T	C	0.0996631	-0.0630949	0.0101997	6.17362e-10	38.2661
Hypertension	rs6756608	G	T	0.323843	-0.0375203	0.00659487	1.27553e-08	32.3683
Hypertension	rs6854861	C	A	0.642318	-0.0436742	0.0063291	5.18084e-12	47.6174
Hypertension	rs6860901	T	C	0.297125	0.0612556	0.00663407	2.61999e-20	85.2573
Hypertension	rs6905288	A	G	0.566595	0.0335797	0.00615563	4.89396e-08	29.7583
Hypertension	rs6918791	G	C	0.729129	0.04264	0.0068517	4.86878e-10	38.7291
Hypertension	rs6961048	G	C	0.135895	0.0755163	0.00884069	1.32038e-17	72.9641
Hypertension	rs7110547	G	C	0.314083	0.0367157	0.00654767	2.05334e-08	31.4434
Hypertension	rs7123454	A	C	0.824291	-0.050964	0.00797956	1.69371e-10	40.7914
Hypertension	rs7125196	C	T	0.170687	-0.0656732	0.00809968	5.14044e-16	65.7417
Hypertension	rs7129204	C	G	0.151742	0.0518736	0.00846126	8.74843e-10	37.5857
Hypertension	rs7134677	T	C	0.382155	-0.063846	0.00627742	2.67855e-24	103.444
Hypertension	rs7139122	A	G	0.0200106	0.188318	0.0216356	3.20111e-18	75.761
Hypertension	rs7246342	A	G	0.454382	0.0347793	0.00611457	1.28582e-08	32.3526
Hypertension	rs72689147	T	G	0.217231	-0.0636185	0.00737374	6.25893e-18	74.4374
Hypertension	rs72779268	A	C	0.0643388	-0.10927	0.0125059	2.38397e-18	76.3435
Hypertension	rs72861762	C	T	0.211776	0.0453935	0.00745983	1.16447e-09	37.0279
Hypertension	rs72877309	G	A	0.143224	-0.0580764	0.00867995	2.21871e-11	44.7677
Hypertension	rs7301566	C	T	0.58724	-0.0436176	0.00616926	1.54775e-12	49.987
Hypertension	rs73029563	G	C	0.614349	0.0478535	0.00626601	2.22331e-14	58.3237
Hypertension	rs7310615	G	C	0.586339	-0.0704075	0.00617237	3.86278e-30	130.117
Hypertension	rs7341791	G	A	0.43593	0.0385824	0.00613215	3.13755e-10	39.587
Hypertension	rs75230966	A	G	0.160647	0.0639578	0.00829778	1.27968e-14	59.4105
Hypertension	rs75672964	T	C	0.0790235	0.0665636	0.0113203	4.10204e-09	34.5746
Hypertension	rs7683733	T	C	0.338879	0.0385794	0.00643908	2.07979e-09	35.8974
Hypertension	rs7723153	A	G	0.387271	0.0368839	0.00622171	3.06182e-09	35.1442
Hypertension	rs77249653	T	A	0.0265654	-0.116434	0.0191136	1.11725e-09	37.1086
Hypertension	rs78058190	A	G	0.082725	0.0692394	0.0110524	3.73654e-10	39.2458
Hypertension	rs7809934	C	T	0.327839	0.0367156	0.00646958	1.38589e-08	32.2069
Hypertension	rs78412528	A	G	0.167725	0.116846	0.00809997	3.5752e-47	208.095
Hypertension	rs7874497	G	A	0.627632	0.036214	0.00633118	1.06554e-08	32.7178
Hypertension	rs7898224	A	G	0.383439	0.041365	0.00627106	4.21891e-11	43.5095
Hypertension	rs7938342	A	T	0.574189	0.0596586	0.00615064	3.02761e-22	94.0818
Hypertension	rs79622589	T	C	0.219171	-0.0433356	0.00741299	5.03814e-09	34.1745
Hypertension	rs80150773	T	C	0.0305235	0.123933	0.0177352	2.78933e-12	48.8317
Hypertension	rs80203904	A	C	0.0724243	0.0644223	0.0117138	3.80417e-08	30.2466
Hypertension	rs880315	C	T	0.413241	0.0757671	0.00617624	1.35332e-34	150.492
Hypertension	rs9297164	T	C	0.620091	-0.0348923	0.00629082	2.9138e-08	30.7641
Hypertension	rs941208	T	C	0.675243	-0.036505	0.0064959	1.91285e-08	31.581
Hypertension	rs9508490	T	C	0.641552	-0.0373823	0.00634691	3.86554e-09	34.6902
Hypertension	rs9590507	C	T	0.212087	0.0433628	0.00742398	5.1917e-09	34.1162
Hypertension	rs9679855	G	A	0.0336122	0.109478	0.0169847	1.15072e-10	41.5468
Hypertension	rs9817804	T	C	0.0831813	0.0639868	0.0109872	5.7536e-09	33.9162
Hypertension	rs9836592	T	C	0.651293	0.0351798	0.0064007	3.87954e-08	30.2087
Hypertension	rs9851392	A	T	0.550532	0.0335052	0.00610444	4.05005e-08	30.1254
Hypertension	rs9899012	A	G	0.0823647	-0.0800878	0.0112285	9.85145e-13	50.8732
Hypertensive Heart Disease	rs12509595	C	T	0.311085	0.111048	0.0188702	3.98446e-09	34.6313
Hypertensive Heart Disease	rs1275980	T	C	0.552489	-0.12814	0.0175504	2.85102e-13	53.3084
Hypertensive Heart Disease	rs17035646	A	G	0.393563	0.130885	0.0178369	2.1702e-13	53.8445
Hypertensive Heart Disease	rs3918226	T	C	0.0679773	0.202453	0.0338441	2.20491e-09	35.7835
Hypertensive Heart Disease	rs56310356	G	C	0.40199	0.109044	0.0178395	9.8098e-10	37.3627
Hypertensive Heart Disease	rs661348	C	T	0.469773	0.125612	0.0175183	7.4817e-13	51.4136
Hypertensive Heart Disease	rs6973893	C	T	0.914317	0.189024	0.0325727	6.50819e-09	33.6765
Hypertensive Heart Disease	rs79832592	T	C	0.222542	0.13014	0.0207688	3.70195e-10	39.2644
Heart failure	rs10022996	C	T	0.115206	-0.0736879	0.0163589	6.65411e-06	20.2901
Heart failure	rs10119785	G	T	0.16169	-0.0715379	0.014061	3.62485e-07	25.8845
Heart failure	rs10221252	G	A	0.137899	0.0743961	0.0147415	4.49469e-07	25.4693
Heart failure	rs1027840	G	A	0.765216	-0.0549547	0.0120662	5.25255e-06	20.7429
Heart failure	rs111344003	T	A	0.0495069	-0.111872	0.0242858	4.09506e-06	21.2196
Heart failure	rs111974719	A	G	0.02107	0.186195	0.0347762	8.59924e-08	28.6663
Heart failure	rs11244061	T	C	0.103788	0.0737182	0.016619	9.17424e-06	19.6761
Heart failure	rs11250137	A	C	0.000188408	1.4454	0.311336	3.4408e-06	21.5535
Heart failure	rs115188760	A	G	0.0135815	0.200926	0.0429969	2.96791e-06	21.8373
Heart failure	rs117431397	G	A	0.065831	0.0917149	0.0204796	7.52177e-06	20.0557
Heart failure	rs117913411	A	T	0.0714867	0.0898757	0.0197223	5.18752e-06	20.7668
Heart failure	rs12107082	A	G	0.0402472	-0.123757	0.0266634	3.45979e-06	21.5431
Heart failure	rs139588694	G	A	0.0168155	-0.210819	0.0421707	5.75718e-07	24.9918
Heart failure	rs144689254	A	G	0.0192248	0.164289	0.0362522	5.84696e-06	20.5375
Heart failure	rs1474827	A	T	0.80489	-0.0570274	0.0128681	9.34997e-06	19.6399
Heart failure	rs149672396	C	G	0.00477311	-0.363374	0.0816509	8.57354e-06	19.8055
Heart failure	rs1523893	C	T	0.268705	0.0511217	0.0114862	8.55914e-06	19.8088
Heart failure	rs157239	G	T	0.0367697	0.137241	0.026686	2.70651e-07	26.4485
Heart failure	rs16966848	C	T	0.0111034	0.208967	0.0465928	7.29256e-06	20.1149
Heart failure	rs1906596	T	C	0.85508	-0.119549	0.0143065	6.47292e-17	69.8273
Heart failure	rs193034476	A	G	0.00524355	-0.38672	0.0801306	1.39216e-06	23.2914
Heart failure	rs2033583	G	A	0.898826	-0.0761451	0.0168105	5.90922e-06	20.5174
Heart failure	rs216219	C	T	0.663782	-0.058555	0.0107524	5.15822e-08	29.6563
Heart failure	rs2207792	A	G	0.754347	-0.0732524	0.011789	5.17738e-10	38.6091
Heart failure	rs2292836	C	A	0.475102	-0.0456741	0.0102576	8.48008e-06	19.8266
Heart failure	rs2337699	T	C	0.535004	0.0506385	0.0103007	8.83222e-07	24.1673
Heart failure	rs252355	G	T	0.708104	-0.0516656	0.0112764	4.61073e-06	20.9924
Heart failure	rs3176323	C	T	0.291483	-0.0843121	0.0114069	1.45378e-13	54.6317
Heart failure	rs35232729	T	C	0.164178	-0.0650869	0.0140251	3.47152e-06	21.5365
Heart failure	rs35783704	A	G	0.155047	-0.0661836	0.0143006	3.69182e-06	21.4187
Heart failure	rs35994303	T	C	0.557557	-0.0478917	0.0103128	3.41877e-06	21.5659
Heart failure	rs3731204	C	T	0.103559	0.0805525	0.0166095	1.23595e-06	23.5204
Heart failure	rs427614	A	G	0.569044	-0.0464081	0.0103734	7.68635e-06	20.0145
Heart failure	rs45628537	T	G	0.0888344	0.0796011	0.0178709	8.41918e-06	19.8402
Heart failure	rs4605551	C	T	0.33418	0.0539986	0.0108581	6.5881e-07	24.7319
Heart failure	rs490812	C	A	0.421948	-0.0463477	0.0103829	8.04952e-06	19.9259
Heart failure	rs56202902	C	T	0.0215721	0.200162	0.0335068	2.31857e-09	35.686
Heart failure	rs56212744	C	A	0.0444802	0.116288	0.024586	2.24683e-06	22.3714
Heart failure	rs59642441	A	G	0.398397	0.0490956	0.0105018	2.94029e-06	21.8553
Heart failure	rs614956	A	G	0.711674	-0.0512955	0.0112219	4.854e-06	20.8942
Heart failure	rs6909574	G	A	0.256103	0.0554813	0.0116683	1.98573e-06	22.6088
Heart failure	rs7037559	G	A	0.0492387	0.106061	0.0232769	5.20164e-06	20.7616
Heart failure	rs7222710	A	G	0.42552	0.0482179	0.0103446	3.14391e-06	21.7265
Heart failure	rs74758884	A	C	0.12844	0.0696316	0.015209	4.68716e-06	20.961
Heart failure	rs74948679	A	G	0.272508	-0.0561227	0.0118287	2.08896e-06	22.5114
Heart failure	rs7605601	G	T	0.514112	-0.0528261	0.0102309	2.42505e-07	26.6606
Heart failure	rs76299149	A	G	0.137496	0.0681372	0.0147252	3.7057e-06	21.4115
Heart failure	rs76644287	C	T	0.0106489	0.218168	0.0471164	3.64947e-06	21.4406
Heart failure	rs7680240	C	A	0.456079	-0.0546709	0.0102882	1.07293e-07	28.238
Heart failure	rs77035786	T	G	0.0874874	0.0820473	0.018086	5.71913e-06	20.5799
Heart failure	rs77036134	C	T	0.0173573	-0.188378	0.0416862	6.21455e-06	20.4209
Heart failure	rs78163988	A	T	0.0228153	0.151886	0.0333098	5.12012e-06	20.7918
Heart failure	rs78639818	A	G	0.082295	-0.109241	0.0192329	1.34766e-08	32.2613
Heart failure	rs79249024	A	G	0.105265	0.0747203	0.0165549	6.37735e-06	20.3716
Heart failure	rs79705656	A	G	0.166659	-0.0624595	0.0139048	7.05797e-06	20.1775
Heart failure	rs8057084	G	T	0.627888	0.0495582	0.0106374	3.17965e-06	21.705
Heart failure	rs880315	C	T	0.413218	0.0465529	0.0103973	7.55597e-06	20.0471
Heart failure	rs9508127	T	C	0.233542	0.0582573	0.0120849	1.4307e-06	23.2388
Heart failure	rs9508127	T	C	0.233542	0.0582573	0.0120849	1.4307e-06	23.2388
Coronary heart disease	rs1044506	G	T	0.866469	0.0813678	0.012695	1.4606e-10	41.0809
Coronary heart disease	rs10455872	G	A	0.0464022	0.248024	0.0194967	4.50194e-37	161.832
Coronary heart disease	rs10514559	C	G	0.417076	-0.0524292	0.00869481	1.64021e-09	36.3602
Coronary heart disease	rs10774624	A	G	0.59792	-0.0596518	0.00876841	1.02447e-11	46.2813
Coronary heart disease	rs10965525	C	T	0.482572	-0.0503629	0.00863546	5.47331e-09	34.0134
Coronary heart disease	rs11072473	G	A	0.716438	-0.0567174	0.00949313	2.30696e-09	35.6955
Coronary heart disease	rs11238794	A	C	0.704241	0.0673854	0.00945853	1.04616e-12	50.7556
Coronary heart disease	rs113113862	A	G	0.214859	-0.0862496	0.0105627	3.20111e-16	66.6752
Coronary heart disease	rs11556924	T	C	0.3269	-0.0578352	0.00916755	2.81404e-10	39.7995
Coronary heart disease	rs11591147	T	G	0.0359342	-0.225633	0.0240465	6.39882e-21	88.0443
Coronary heart disease	rs117733303	G	A	0.0109652	0.383462	0.0388426	5.49541e-23	97.4604
Coronary heart disease	rs11970276	G	A	0.231158	0.0558428	0.0101224	3.45287e-08	30.4346
Coronary heart disease	rs12024166	T	C	0.538284	0.0496549	0.00860959	8.05063e-09	33.2628
Coronary heart disease	rs1208256	T	C	0.395017	0.0621424	0.00877963	1.46251e-12	50.0984
Coronary heart disease	rs12438645	G	A	0.367131	0.0852465	0.00889332	9.2045e-22	91.8809
Coronary heart disease	rs12740374	T	G	0.2144	-0.0892785	0.0105494	2.60856e-17	71.6206
Coronary heart disease	rs13134800	C	T	0.671399	-0.0605579	0.0091031	2.8827e-11	44.2551
Coronary heart disease	rs13324341	T	C	0.144379	0.0854286	0.0120919	1.60694e-12	49.9134
Coronary heart disease	rs137943060	A	G	0.0185251	0.274465	0.0307948	4.97966e-19	79.4363
Coronary heart disease	rs1556516	C	G	0.421516	0.19116	0.00860871	3.04089e-109	493.081
Coronary heart disease	rs16986953	A	G	0.0736377	0.0889822	0.0161727	3.75535e-08	30.272
Coronary heart disease	rs17026396	C	T	0.426487	0.053757	0.00866291	5.45507e-10	38.5072
Coronary heart disease	rs17163301	C	T	0.748971	0.0599365	0.00994202	1.65386e-09	36.3441
Coronary heart disease	rs17489268	A	T	0.246162	-0.0580664	0.0100054	6.49531e-09	33.6807
Coronary heart disease	rs17612693	A	T	0.126653	0.121692	0.0127039	9.79039e-22	91.7593
Coronary heart disease	rs1957451	T	G	0.993154	-0.2742	0.0501149	4.46427e-08	29.9365
Coronary heart disease	rs2000660	A	G	0.0784908	-0.111381	0.0163912	1.08193e-11	46.1743
Coronary heart disease	rs2019090	T	A	0.784313	-0.0617238	0.0103584	2.5405e-09	35.5075
Coronary heart disease	rs2107595	A	G	0.193959	0.0847692	0.0107876	3.90211e-15	61.7485
Coronary heart disease	rs2246833	T	C	0.415577	0.050189	0.00868999	7.67255e-09	33.3564
Coronary heart disease	rs2777787	G	A	0.303373	-0.0528141	0.00941702	2.04249e-08	31.4538
Coronary heart disease	rs28451064	A	G	0.153025	0.119474	0.0117468	2.67793e-24	103.445
Coronary heart disease	rs28533705	T	C	0.0287192	-0.182976	0.0263683	3.94185e-12	48.1531
Coronary heart disease	rs294634	G	T	0.316571	0.0511656	0.00918888	2.57365e-08	31.0049
Coronary heart disease	rs34626613	C	A	0.356517	-0.0495138	0.00897072	3.39993e-08	30.4648
Coronary heart disease	rs3731204	C	T	0.103547	0.0979485	0.013906	1.87327e-12	49.6125
Coronary heart disease	rs3741298	T	C	0.768529	-0.0686374	0.0101005	1.07969e-11	46.1781
Coronary heart disease	rs3918226	T	C	0.0697572	0.09601	0.0166538	8.16282e-09	33.2358
Coronary heart disease	rs4632638	A	G	0.786398	-0.0905005	0.0103721	2.65277e-18	76.1322
Coronary heart disease	rs4790323	G	A	0.719556	0.0639077	0.00958808	2.64058e-11	44.4266
Coronary heart disease	rs4803447	G	A	0.154968	0.0702925	0.0118029	2.59257e-09	35.4683
Coronary heart disease	rs565898017	T	G	0.0288113	-0.246486	0.0265295	1.52792e-20	86.323
Coronary heart disease	rs572512	T	C	0.339192	0.0518389	0.00911765	1.30386e-08	32.3255
Coronary heart disease	rs57535646	C	T	0.136922	0.0878181	0.0124178	1.52792e-12	50.0125
Coronary heart disease	rs6119534	T	C	0.399298	0.0528535	0.00873785	1.45928e-09	36.588
Coronary heart disease	rs62052481	A	C	0.0583019	-0.103713	0.018686	2.85128e-08	30.8059
Coronary heart disease	rs6727888	C	T	0.65097	0.0490327	0.00898279	4.8012e-08	29.7954
Coronary heart disease	rs6892439	C	A	0.4622	-0.0503296	0.00865779	6.1283e-09	33.7935
Coronary heart disease	rs6946226	A	G	0.358346	0.0516936	0.00891971	6.81475e-09	33.5871
Coronary heart disease	rs6982502	T	C	0.549402	-0.0530355	0.00858589	6.5307e-10	38.156
Coronary heart disease	rs72664318	G	A	0.109149	-0.099032	0.0138518	8.71565e-13	51.1139
Coronary heart disease	rs72938351	G	A	0.0962732	0.127901	0.0143006	3.76097e-19	79.9907
Coronary heart disease	rs7412	T	C	0.0534036	-0.179807	0.0194725	2.60976e-20	85.2648
Coronary heart disease	rs7968719	G	C	0.521084	0.0478457	0.00869909	3.79621e-08	30.2509
Coronary heart disease	rs9349379	G	A	0.452036	0.122693	0.00856961	1.70923e-46	204.983
Coronary heart disease	rs9515203	C	T	0.261192	-0.0796124	0.00979264	4.29932e-16	66.094
Coronary heart disease	rs9935849	C	G	0.362795	-0.064023	0.00899406	1.09219e-12	50.6711
Type 2 diabetes	rs10084393	A	C	0.226945	-0.0597826	0.00883336	1.30737e-11	45.8034
Type 2 diabetes	rs10184004	T	C	0.359629	-0.0616558	0.00766949	9.05107e-16	64.6271
Type 2 diabetes	rs10245867	T	G	0.329762	0.0667992	0.00776866	8.07235e-18	73.935
Type 2 diabetes	rs10406431	G	A	0.447114	-0.0603818	0.00738293	2.8721e-16	66.889
Type 2 diabetes	rs1046316	G	A	0.612825	0.0670359	0.00756835	8.1903e-19	78.4535
Type 2 diabetes	rs10466811	A	G	0.23681	-0.0505182	0.00872142	6.93761e-09	33.5522
Type 2 diabetes	rs10509937	A	C	0.904951	0.0739545	0.0126424	4.92448e-09	34.2192
Type 2 diabetes	rs10759932	C	T	0.254091	-0.0470564	0.00847697	2.83883e-08	30.8146
Type 2 diabetes	rs10770143	T	C	0.660717	-0.0660748	0.00771434	1.07895e-17	73.3625
Type 2 diabetes	rs10822803	C	T	0.176673	0.0531386	0.00965437	3.71056e-08	30.2951
Type 2 diabetes	rs10830963	G	C	0.356876	0.104441	0.00762245	9.91288e-43	187.738
Type 2 diabetes	rs10882099	C	T	0.47742	-0.0658291	0.0073472	3.25387e-19	80.2772
Type 2 diabetes	rs10953112	C	T	0.230702	0.0481074	0.0087154	3.39359e-08	30.4684
Type 2 diabetes	rs10974438	C	A	0.374275	0.0447025	0.00756925	3.50946e-09	34.8785
Type 2 diabetes	rs10998851	G	T	0.468412	0.0452661	0.00737503	8.36932e-10	37.672
Type 2 diabetes	rs11075985	A	C	0.428526	0.113663	0.00737798	1.49727e-53	237.336
Type 2 diabetes	rs11124906	C	G	0.386806	-0.0416142	0.00760327	4.42008e-08	29.9559
Type 2 diabetes	rs11147192	A	G	0.364546	0.0429696	0.00765517	1.98687e-08	31.5074
Type 2 diabetes	rs11169182	T	C	0.493358	0.0447713	0.00734771	1.10655e-09	37.1275
Type 2 diabetes	rs111908763	T	C	0.210592	0.059642	0.00893326	2.44906e-11	44.5743
Type 2 diabetes	rs112108223	A	G	0.0226984	-0.350842	0.0265328	6.46994e-40	174.847
Type 2 diabetes	rs11257659	T	C	0.264984	0.082486	0.00828764	2.44963e-23	99.0601
Type 2 diabetes	rs112650492	G	C	0.0350718	0.162853	0.0194749	6.1546e-17	69.9264
Type 2 diabetes	rs112694524	A	G	0.0330508	-0.158285	0.0212513	9.46019e-14	55.4764
Type 2 diabetes	rs114322470	G	T	0.0233807	-0.202797	0.0252869	1.05901e-15	64.3179
Type 2 diabetes	rs11558471	G	A	0.377692	-0.081244	0.00758484	9.00326e-27	114.733
Type 2 diabetes	rs11603763	A	G	0.477107	-0.0405524	0.00733855	3.27725e-08	30.536
Type 2 diabetes	rs11708067	G	A	0.170197	-0.0777189	0.0098432	2.88735e-15	62.342
Type 2 diabetes	rs11759897	G	A	0.626939	-0.0438258	0.00759444	7.8906e-09	33.3018
Type 2 diabetes	rs11774221	G	A	0.21873	-0.0561674	0.00900024	4.35733e-10	38.9458
Type 2 diabetes	rs1182436	C	T	0.853304	0.0803564	0.010483	1.78238e-14	58.7584
Type 2 diabetes	rs12001437	C	T	0.35211	0.0422645	0.00766508	3.5097e-08	30.4031
Type 2 diabetes	rs12113083	C	G	0.412582	0.057298	0.00745169	1.47979e-14	59.1248
Type 2 diabetes	rs12195206	T	C	0.235826	0.0529759	0.00858786	6.88541e-10	38.0528
Type 2 diabetes	rs12449219	G	C	0.058888	0.0863178	0.0154267	2.20186e-08	31.308
Type 2 diabetes	rs12487788	G	A	0.285431	-0.0454544	0.00815486	2.49098e-08	31.0684
Type 2 diabetes	rs12507026	T	A	0.472656	0.0597855	0.00734742	4.05415e-16	66.2098
Type 2 diabetes	rs12555274	C	G	0.276172	0.0985543	0.00814325	1.02353e-33	146.472
Type 2 diabetes	rs1260326	C	T	0.650546	0.057516	0.00772886	9.93802e-14	55.3792
Type 2 diabetes	rs1265089	A	G	0.22469	0.0509325	0.00874308	5.69561e-09	33.936
Type 2 diabetes	rs12769661	A	G	0.276194	-0.0498264	0.00827087	1.69817e-09	36.2925
Type 2 diabetes	rs12887636	G	T	0.397911	-0.0411766	0.00752331	4.41967e-08	29.9559
Type 2 diabetes	rs13303359	C	A	0.494293	-0.0424451	0.00736661	8.32147e-09	33.1986
Type 2 diabetes	rs137966325	A	T	0.0317875	0.115117	0.0204829	1.90801e-08	31.5861
Type 2 diabetes	rs1397566	G	A	0.428122	-0.0455627	0.00741314	7.93542e-10	37.7759
Type 2 diabetes	rs141433349	A	G	0.031274	0.119212	0.0209838	1.33823e-08	32.2754
Type 2 diabetes	rs1415287	T	C	0.299058	-0.0480447	0.00804008	2.29176e-09	35.7084
Type 2 diabetes	rs142682088	A	G	0.041161	-0.128	0.0188779	1.1984e-11	45.974
Type 2 diabetes	rs149991550	T	C	0.022239	0.197029	0.0240342	2.44681e-16	67.2049
Type 2 diabetes	rs150020693	A	G	0.0623623	0.0870355	0.0150201	6.84778e-09	33.5774
Type 2 diabetes	rs1592499	C	A	0.0782139	-0.0774512	0.0138068	2.02736e-08	31.4681
Type 2 diabetes	rs1646629	T	C	0.434617	0.0534899	0.00738478	4.38026e-13	52.4649
Type 2 diabetes	rs167336	T	C	0.517734	0.0518049	0.00736307	1.98153e-12	49.5021
Type 2 diabetes	rs17008861	T	C	0.0670459	-0.0902865	0.0150113	1.80347e-09	36.175
Type 2 diabetes	rs17036160	T	C	0.172158	-0.0914343	0.00984122	1.52933e-20	86.3218
Type 2 diabetes	rs17168486	T	C	0.198072	0.05164	0.00914386	1.62798e-08	31.8943
Type 2 diabetes	rs17659428	C	T	0.547605	0.0643116	0.00736659	2.54273e-18	76.2159
Type 2 diabetes	rs17772814	A	G	0.10356	-0.0832566	0.0125332	3.0761e-11	44.1279
Type 2 diabetes	rs17791633	C	T	0.126811	-0.0643446	0.0111863	8.81394e-09	33.0865
Type 2 diabetes	rs200641079	C	T	0.187873	-0.0775503	0.00953276	4.11434e-16	66.1804
Type 2 diabetes	rs2034085	C	T	0.370359	0.0477721	0.00758038	2.93677e-10	39.7161
Type 2 diabetes	rs2113841	T	C	0.490206	-0.0412562	0.00733241	1.83844e-08	31.6581
Type 2 diabetes	rs2521247	T	C	0.608683	0.0459995	0.00756573	1.20196e-09	36.9662
Type 2 diabetes	rs2682907	A	G	0.412562	-0.0624931	0.00747652	6.34746e-17	69.8659
Type 2 diabetes	rs28553330	C	T	0.0605819	-0.100884	0.0157024	1.32084e-10	41.2774
Type 2 diabetes	rs28624681	T	C	0.29321	-0.0795637	0.00812481	1.21032e-22	95.8967
Type 2 diabetes	rs2894553	T	C	0.0853703	-0.0837764	0.0133161	3.14652e-10	39.5812
Type 2 diabetes	rs2925979	C	T	0.676881	-0.0521393	0.00781591	2.54214e-11	44.5012
Type 2 diabetes	rs2943646	G	A	0.638785	0.0703888	0.00764947	3.52046e-20	84.6729
Type 2 diabetes	rs34206253	T	G	0.344161	-0.0437157	0.00779155	2.01558e-08	31.4795
Type 2 diabetes	rs348330	A	G	0.644452	-0.0474873	0.00766933	5.94648e-10	38.3389
Type 2 diabetes	rs35271178	T	C	0.500092	-0.0664411	0.00733042	1.26038e-19	82.1516
Type 2 diabetes	rs35352848	C	T	0.310538	-0.0690299	0.00797897	5.08394e-18	74.8481
Type 2 diabetes	rs35658696	G	A	0.0576553	0.10516	0.0154482	9.94718e-12	46.3389
Type 2 diabetes	rs3731503	C	T	0.329841	0.0448332	0.00779451	8.8249e-09	33.0843
Type 2 diabetes	rs3887925	T	C	0.463437	0.0550736	0.00736897	7.79651e-14	55.8565
Type 2 diabetes	rs3897942	C	G	0.451568	0.0409763	0.00739184	2.96565e-08	30.7298
Type 2 diabetes	rs4144381	C	T	0.967008	-0.124034	0.0202358	8.81922e-10	37.57
Type 2 diabetes	rs429150	C	T	0.533862	0.0502489	0.0073477	7.99098e-12	46.7682
Type 2 diabetes	rs429358	C	T	0.181488	-0.0798904	0.00971938	2.03986e-16	67.5635
Type 2 diabetes	rs45551238	T	C	0.0490654	-0.178967	0.0176319	3.30598e-24	103.026
Type 2 diabetes	rs4711750	A	T	0.49774	0.0485797	0.00737641	4.52376e-11	43.373
Type 2 diabetes	rs4776970	T	A	0.344317	-0.0451531	0.00772618	5.09085e-09	34.1543
Type 2 diabetes	rs4804833	G	A	0.61932	-0.0462562	0.0075482	8.89263e-10	37.5537
Type 2 diabetes	rs4862423	T	C	0.382332	0.0468802	0.00755375	5.42738e-10	38.5171
Type 2 diabetes	rs488321	C	T	0.905725	-0.0838802	0.0124212	1.4481e-11	45.6028
Type 2 diabetes	rs4937325	C	T	0.66703	-0.0486376	0.00776665	3.79193e-10	39.2172
Type 2 diabetes	rs4990414	G	A	0.195011	0.066095	0.00922217	7.66832e-13	51.3654
Type 2 diabetes	rs554186429	C	G	0.0592328	-0.100228	0.0162752	7.35343e-10	37.925
Type 2 diabetes	rs56014231	A	G	0.0481081	0.101173	0.0168299	1.83793e-09	36.1382
Type 2 diabetes	rs56348580	C	G	0.284314	-0.0818329	0.00821048	2.12814e-23	99.3388
Type 2 diabetes	rs576123	T	C	0.563707	-0.0577215	0.00738046	5.24687e-15	61.1658
Type 2 diabetes	rs607409	T	A	0.60889	0.0475449	0.00754724	2.98332e-10	39.6855
Type 2 diabetes	rs6142129	G	A	0.329147	-0.0433778	0.00786019	3.4157e-08	30.4557
Type 2 diabetes	rs61779305	C	G	0.151909	0.0720443	0.0102166	1.76767e-12	49.7263
Type 2 diabetes	rs61780655	T	C	0.0891019	0.0707799	0.0127527	2.85332e-08	30.8046
Type 2 diabetes	rs618652	G	T	0.481359	-0.0480722	0.0073436	5.90473e-11	42.8519
Type 2 diabetes	rs62137406	T	C	0.0480904	0.114608	0.0167869	8.65566e-12	46.611
Type 2 diabetes	rs66502159	T	C	0.0966024	-0.113059	0.01264	3.73336e-19	80.0048
Type 2 diabetes	rs6804915	A	C	0.266479	-0.0558298	0.00832478	1.99388e-11	44.9766
Type 2 diabetes	rs6839635	A	C	0.458518	-0.0463857	0.00737291	3.14688e-10	39.5813
Type 2 diabetes	rs6850761	C	A	0.366798	-0.0434562	0.00763012	1.23115e-08	32.437
Type 2 diabetes	rs6878122	A	G	0.772065	-0.0591751	0.0086831	9.42758e-12	46.4439
Type 2 diabetes	rs6931514	G	A	0.328741	0.121761	0.00773535	7.93597e-56	247.774
Type 2 diabetes	rs697239	C	T	0.479482	-0.0486608	0.00732848	3.13762e-11	44.089
Type 2 diabetes	rs7109575	A	G	0.236946	-0.0887827	0.00871987	2.39442e-24	103.666
Type 2 diabetes	rs7215687	G	A	0.475561	0.0449443	0.00736558	1.0479e-09	37.2336
Type 2 diabetes	rs7224685	T	G	0.30133	0.0634905	0.00795284	1.42364e-15	63.7343
Type 2 diabetes	rs7226371	G	A	0.172905	0.0558395	0.00962428	6.55526e-09	33.6625
Type 2 diabetes	rs72926954	T	C	0.100797	0.0758267	0.0120883	3.54756e-10	39.3472
Type 2 diabetes	rs73040004	C	T	0.221352	0.0687878	0.00881723	6.11646e-15	60.8637
Type 2 diabetes	rs73061095	G	T	0.307835	0.0937922	0.00788073	1.16305e-32	141.645
Type 2 diabetes	rs73224247	C	T	0.101957	-0.0708273	0.0124298	1.21079e-08	32.4693
Type 2 diabetes	rs73347525	G	A	0.220594	-0.0499098	0.00896303	2.57087e-08	31.0072
Type 2 diabetes	rs739753	T	A	0.241011	-0.0629581	0.00869853	4.56037e-13	52.3855
Type 2 diabetes	rs74046911	T	C	0.0760897	-0.188667	0.0144156	3.87436e-39	171.288
Type 2 diabetes	rs7563362	G	A	0.853938	0.068291	0.0104841	7.32993e-11	42.4292
Type 2 diabetes	rs7661876	G	T	0.496881	0.0465679	0.00733501	2.1712e-10	40.3062
Type 2 diabetes	rs76895963	G	T	0.0307466	-0.497761	0.0240707	5.33949e-95	427.626
Type 2 diabetes	rs77735929	A	T	0.0432864	0.146118	0.0177617	1.92619e-16	67.6766
Type 2 diabetes	rs7788808	C	T	0.752779	0.0521187	0.00855364	1.10701e-09	37.1266
Type 2 diabetes	rs78470967	A	T	0.0398684	-0.211189	0.0195868	4.17542e-27	116.256
Type 2 diabetes	rs78721871	A	G	0.0358808	0.106231	0.0194741	4.8979e-08	29.7569
Type 2 diabetes	rs7903146	T	C	0.200084	0.248975	0.00893664	8.14704e-171	776.181
Type 2 diabetes	rs79356898	A	G	0.0553362	0.102132	0.0158046	1.03198e-10	41.7596
Type 2 diabetes	rs7998259	A	G	0.390825	-0.0557211	0.00756967	1.8239e-13	54.1858
Type 2 diabetes	rs8073177	C	T	0.745204	-0.0559054	0.00839539	2.7555e-11	44.3431
Type 2 diabetes	rs8077150	A	G	0.321986	0.0428261	0.00782316	4.39309e-08	29.9676
Type 2 diabetes	rs8100204	A	G	0.158204	0.0765964	0.0100264	2.18122e-14	58.3615
Type 2 diabetes	rs835575	T	G	0.137198	0.0650074	0.0105753	7.89078e-10	37.7868
Type 2 diabetes	rs853974	C	T	0.731302	-0.0543089	0.00820936	3.70339e-11	43.7646
Type 2 diabetes	rs878521	A	G	0.206229	0.0748096	0.00899106	8.76395e-17	69.2298
Type 2 diabetes	rs9350408	T	C	0.511586	-0.045316	0.00735052	7.04823e-10	38.0073
Type 2 diabetes	rs9410573	C	T	0.416782	-0.040844	0.00744877	4.17407e-08	30.0668
Type 2 diabetes	rs9505086	C	T	0.444739	0.0644294	0.0073919	2.87607e-18	75.9724
Type 2 diabetes	rs963740	T	A	0.21227	-0.0585871	0.00902114	8.33489e-11	42.1775
Type 2 diabetes	rs983679	A	G	0.764993	-0.0514421	0.00860874	2.29293e-09	35.7074
Hyperthyroidism	rs10799824	A	G	0.122334	0.188614	0.0246306	1.89278e-14	58.6405
Hyperthyroidism	rs114322847	T	C	0.0230424	0.369247	0.0506481	3.08958e-13	53.1505
Hyperthyroidism	rs11571297	C	T	0.372103	-0.14518	0.0176346	1.83021e-16	67.777
Hyperthyroidism	rs12284404	A	G	0.303957	0.197318	0.0178777	2.52988e-28	121.818
Hyperthyroidism	rs12553375	C	T	0.0171287	0.328614	0.0589873	2.5339e-08	31.0352
Hyperthyroidism	rs13098877	T	C	0.520157	0.112321	0.0169461	3.40017e-11	43.9321
Hyperthyroidism	rs1861628	G	A	0.624593	-0.120478	0.0172955	3.26287e-12	48.5232
Hyperthyroidism	rs1985791	T	G	0.454747	-0.120843	0.0175373	5.5552e-12	47.4807
Hyperthyroidism	rs200293726	T	A	0.306144	0.15651	0.0181032	5.36043e-18	74.7435
Hyperthyroidism	rs2160215	C	T	0.295649	0.2336	0.0179799	1.35301e-38	168.799
Hyperthyroidism	rs2466073	A	G	0.407065	-0.117448	0.0174031	1.49176e-11	45.5447
Hyperthyroidism	rs2476601	G	A	0.852144	-0.220616	0.022587	1.55382e-22	95.4019
Hyperthyroidism	rs2647004	C	T	0.100982	0.522697	0.0242411	4.04576e-103	464.938
Hyperthyroidism	rs2928167	G	A	0.200152	0.133815	0.0206819	9.79039e-11	41.8628
Hyperthyroidism	rs3128965	A	G	0.159778	-0.14052	0.023746	3.26625e-09	35.0183
Hyperthyroidism	rs34162105	C	T	0.179735	-0.158211	0.0228655	4.54255e-12	47.8753
Hyperthyroidism	rs3798547	G	A	0.926165	-0.234841	0.030357	1.02612e-14	59.8453
Hyperthyroidism	rs4338740	C	T	0.31383	0.193043	0.0177939	2.01883e-27	117.697
Hyperthyroidism	rs4804413	T	C	0.396996	-0.0999624	0.017413	9.42996e-09	32.9554
Hyperthyroidism	rs4926554	G	A	0.0646238	-0.263796	0.0373013	1.52686e-12	50.0136
Hyperthyroidism	rs57269846	C	T	0.413077	-0.131437	0.0172354	2.42159e-14	58.1557
Hyperthyroidism	rs59381142	A	G	0.186379	0.122439	0.0212788	8.71285e-09	33.1089
Hyperthyroidism	rs6065926	G	A	0.727777	0.122815	0.0193591	2.23815e-10	40.2469
Hyperthyroidism	rs675763	G	A	0.597592	0.113562	0.0174079	6.86278e-11	42.5572
Hyperthyroidism	rs6923866	C	T	0.205421	0.121454	0.0204654	2.9453e-09	35.2195
Hyperthyroidism	rs72891915	A	G	0.0399954	0.393396	0.0384841	1.5758e-24	104.495
Hyperthyroidism	rs73744913	T	C	0.0781247	0.229325	0.0293868	6.01312e-15	60.8973
Hyperthyroidism	rs7529705	A	G	0.340606	-0.117489	0.0180763	8.05193e-11	42.245
Hyperthyroidism	rs9265530	G	A	0.0561338	-0.233365	0.0390893	2.37159e-09	35.6415
Autoimmune-related hypothyroidism	rs10008892	A	C	0.123091	-0.151395	0.0131437	1.06463e-30	132.675
Autoimmune-related hypothyroidism	rs10112995	A	G	0.612318	0.0483905	0.00851337	1.31532e-08	32.3085
Autoimmune-related hypothyroidism	rs10118880	A	G	0.723956	-0.0666212	0.00920486	4.56667e-13	52.383
Autoimmune-related hypothyroidism	rs10166287	G	T	0.102756	-0.0881637	0.0138928	2.21004e-10	40.2717
Autoimmune-related hypothyroidism	rs10259879	G	A	0.232158	0.0571615	0.00983933	6.26614e-09	33.7502
Autoimmune-related hypothyroidism	rs10481413	T	C	0.444792	-0.050671	0.008348	1.28038e-09	36.8429
Autoimmune-related hypothyroidism	rs10494077	A	G	0.213359	0.110234	0.00997883	2.27091e-28	122.031
Autoimmune-related hypothyroidism	rs10748781	A	C	0.652669	-0.0801497	0.00869	2.88337e-20	85.0676
Autoimmune-related hypothyroidism	rs1079418	G	A	0.261894	-0.0852228	0.00948814	2.65828e-19	80.6769
Autoimmune-related hypothyroidism	rs10814915	C	T	0.543644	-0.0698807	0.00829364	3.58261e-17	70.9944
Autoimmune-related hypothyroidism	rs10858026	G	T	0.807372	0.0666008	0.010654	4.07221e-10	39.0781
Autoimmune-related hypothyroidism	rs10948107	A	G	0.202244	-0.0672386	0.0104134	1.06859e-10	41.692
Autoimmune-related hypothyroidism	rs11079035	A	G	0.202278	0.0738873	0.0102138	4.68813e-13	52.3317
Autoimmune-related hypothyroidism	rs11086103	A	G	0.581378	0.048539	0.008449	9.19539e-09	33.0043
Autoimmune-related hypothyroidism	rs111352680	A	G	0.323629	-0.0509487	0.00894548	1.2303e-08	32.4384
Autoimmune-related hypothyroidism	rs11571297	C	T	0.373405	-0.121325	0.0086075	4.06069e-45	198.677
Autoimmune-related hypothyroidism	rs116776245	A	G	0.0833056	0.0869905	0.014733	3.53761e-09	34.8627
Autoimmune-related hypothyroidism	rs11683207	C	T	0.278037	-0.0536415	0.0093111	8.36065e-09	33.1894
Autoimmune-related hypothyroidism	rs116909374	T	C	0.0307306	-0.200296	0.0252758	2.29245e-15	62.7964
Autoimmune-related hypothyroidism	rs116938742	C	G	0.0426559	-0.116601	0.0211224	3.38532e-08	30.4732
Autoimmune-related hypothyroidism	rs116938742	C	G	0.0426559	-0.116601	0.0211224	3.38532e-08	30.4732
Autoimmune-related hypothyroidism	rs11694732	C	G	0.429568	0.108605	0.00835572	1.26067e-38	168.94
Autoimmune-related hypothyroidism	rs11969311	C	A	0.252339	-0.0545027	0.00956667	1.21832e-08	32.4575
Autoimmune-related hypothyroidism	rs1203943	C	T	0.79178	0.103531	0.010372	1.83189e-23	99.6359
Autoimmune-related hypothyroidism	rs12091047	T	C	0.316692	0.0927867	0.00885449	1.0782e-25	109.811
Autoimmune-related hypothyroidism	rs12129508	A	G	0.120108	0.0690302	0.0126184	4.48549e-08	29.9274
Autoimmune-related hypothyroidism	rs12206423	T	C	0.14809	0.0655998	0.0115195	1.23609e-08	32.4293
Autoimmune-related hypothyroidism	rs123378	A	G	0.617779	-0.0502193	0.00852516	3.84521e-09	34.7005
Autoimmune-related hypothyroidism	rs12506688	T	C	0.281399	0.0687936	0.00913992	5.20355e-14	56.6515
Autoimmune-related hypothyroidism	rs12540388	T	A	0.185811	-0.0669007	0.0107797	5.42938e-10	38.5166
Autoimmune-related hypothyroidism	rs12697352	A	G	0.395739	-0.0514445	0.00850986	1.49156e-09	36.5454
Autoimmune-related hypothyroidism	rs12736474	A	G	0.31216	0.053367	0.0089364	2.34558e-09	35.6632
Autoimmune-related hypothyroidism	rs12756019	A	G	0.60567	-0.0566832	0.00848487	2.38122e-11	44.6291
Autoimmune-related hypothyroidism	rs12897126	A	T	0.886721	-0.096883	0.0129325	6.8124e-14	56.1216
Autoimmune-related hypothyroidism	rs13137589	G	A	0.368031	-0.0627853	0.00866943	4.4157e-13	52.4487
Autoimmune-related hypothyroidism	rs1317983	C	T	0.680676	0.0980504	0.00900134	1.24652e-27	118.655
Autoimmune-related hypothyroidism	rs13220783	T	G	0.380325	0.0499938	0.00849568	3.98988e-09	34.6287
Autoimmune-related hypothyroidism	rs13447704	C	T	0.0268588	-0.14695	0.0262205	2.09002e-08	31.4092
Autoimmune-related hypothyroidism	rs1371867	C	A	0.428582	0.0487005	0.00836052	5.70939e-09	33.9313
Autoimmune-related hypothyroidism	rs140367581	T	A	0.0226398	0.150777	0.0270362	2.44889e-08	31.1013
Autoimmune-related hypothyroidism	rs141686764	G	A	0.0187788	-0.182081	0.0316857	9.1115e-09	33.0219
Autoimmune-related hypothyroidism	rs1441172	T	C	0.313428	-0.0533644	0.00903023	3.43084e-09	34.9225
Autoimmune-related hypothyroidism	rs144651842	A	G	0.0769692	0.117265	0.015359	2.25892e-14	58.2923
Autoimmune-related hypothyroidism	rs151234	C	G	0.123334	0.0845266	0.0124737	1.23225e-11	45.9194
Autoimmune-related hypothyroidism	rs1534430	T	C	0.417775	-0.056034	0.00841488	2.75867e-11	44.3412
Autoimmune-related hypothyroidism	rs17061602	C	G	0.0573766	-0.103921	0.0182304	1.19523e-08	32.4948
Autoimmune-related hypothyroidism	rs1788105	G	A	0.547645	-0.0462256	0.00832056	2.76681e-08	30.8646
Autoimmune-related hypothyroidism	rs2104047	C	T	0.693491	0.0514534	0.00902662	1.19677e-08	32.4921
Autoimmune-related hypothyroidism	rs2111485	G	A	0.583695	0.0727979	0.00842671	5.67283e-18	74.6314
Autoimmune-related hypothyroidism	rs2235544	A	C	0.5448	-0.0519065	0.0083313	4.65565e-10	38.8166
Autoimmune-related hypothyroidism	rs229528	T	C	0.396388	0.0790766	0.0084354	6.95825e-21	87.8789
Autoimmune-related hypothyroidism	rs2402240	A	G	0.176345	0.0940805	0.0107375	1.91999e-18	76.7702
Autoimmune-related hypothyroidism	rs244689	G	A	0.749122	-0.0718721	0.00947387	3.29003e-14	57.5527
Autoimmune-related hypothyroidism	rs2476601	G	A	0.854687	-0.304028	0.0111921	1.70608e-162	737.911
Autoimmune-related hypothyroidism	rs2531989	A	G	0.817382	-0.0695526	0.010625	5.90473e-11	42.8518
Autoimmune-related hypothyroidism	rs2680296	A	C	0.468365	0.0473154	0.00829442	1.16689e-08	32.5412
Autoimmune-related hypothyroidism	rs2739023	G	C	0.475591	-0.0596371	0.00830172	6.78422e-13	51.6056
Autoimmune-related hypothyroidism	rs2757041	G	C	0.370591	-0.0655054	0.00861293	2.83857e-14	57.8432
Autoimmune-related hypothyroidism	rs28391281	C	T	0.546421	-0.0488629	0.00830364	3.99227e-09	34.6275
Autoimmune-related hypothyroidism	rs28582094	G	A	0.261193	0.0552873	0.00938328	3.81285e-09	34.7169
Autoimmune-related hypothyroidism	rs2921053	C	G	0.499682	-0.0583377	0.00834638	2.75677e-12	48.8542
Autoimmune-related hypothyroidism	rs2928167	G	A	0.199071	-0.101973	0.0105297	3.51722e-22	93.7861
Autoimmune-related hypothyroidism	rs2958154	T	C	0.699391	-0.0616386	0.0089973	7.34514e-12	46.9333
Autoimmune-related hypothyroidism	rs30233	A	G	0.586872	-0.0582169	0.00841513	4.5772e-12	47.8604
Autoimmune-related hypothyroidism	rs3184504	C	T	0.593979	-0.157563	0.0083811	7.58054e-79	353.432
Autoimmune-related hypothyroidism	rs34014255	T	G	0.459087	-0.11178	0.00832964	4.64729e-41	180.084
Autoimmune-related hypothyroidism	rs35717611	T	C	0.378643	0.0487793	0.0085697	1.2551e-08	32.3996
Autoimmune-related hypothyroidism	rs3946137	G	A	0.349188	0.0526375	0.00866007	1.21554e-09	36.9443
Autoimmune-related hypothyroidism	rs41177	A	G	0.404374	-0.0504861	0.00846668	2.47776e-09	35.5564
Autoimmune-related hypothyroidism	rs4409785	C	T	0.165925	0.0882346	0.0109776	9.15377e-16	64.6045
Autoimmune-related hypothyroidism	rs4549506	T	A	0.555383	-0.047318	0.00834263	1.4128e-08	32.1697
Autoimmune-related hypothyroidism	rs4575545	A	G	0.302816	-0.0852985	0.00914861	1.12409e-20	86.9306
Autoimmune-related hypothyroidism	rs4606850	T	C	0.165369	0.0616895	0.0110754	2.5483e-08	31.0244
Autoimmune-related hypothyroidism	rs4704397	A	G	0.41002	0.131555	0.00836138	8.88996e-56	247.548
Autoimmune-related hypothyroidism	rs4743131	G	C	0.653623	0.239235	0.00883865	2.41546e-161	732.618
Autoimmune-related hypothyroidism	rs4804433	T	G	0.692424	-0.0754197	0.00890613	2.49e-17	71.712
Autoimmune-related hypothyroidism	rs482044	C	G	0.318476	0.0898589	0.00883972	2.83074e-24	103.334
Autoimmune-related hypothyroidism	rs4853459	C	T	0.769419	-0.132855	0.0096853	8.0094e-43	188.161
Autoimmune-related hypothyroidism	rs56308324	T	A	0.151062	-0.0828103	0.0117514	1.83021e-12	49.658
Autoimmune-related hypothyroidism	rs568999	C	G	0.315837	-0.0495801	0.0089366	2.88988e-08	30.7801
Autoimmune-related hypothyroidism	rs56983610	A	C	0.13032	-0.108696	0.0125708	5.29907e-18	74.7655
Autoimmune-related hypothyroidism	rs57652885	T	C	0.0530945	-0.112845	0.0189593	2.64948e-09	35.4258
Autoimmune-related hypothyroidism	rs61759532	T	C	0.188962	0.0747524	0.0105202	1.19784e-12	50.4896
Autoimmune-related hypothyroidism	rs61916675	G	A	0.316646	0.0590178	0.00888003	3.00885e-11	44.171
Autoimmune-related hypothyroidism	rs62560877	C	T	0.0341559	-0.136867	0.0236568	7.22886e-09	33.4723
Autoimmune-related hypothyroidism	rs6724363	T	G	0.624805	0.0864868	0.00859042	7.66655e-24	101.361
Autoimmune-related hypothyroidism	rs6831973	C	T	0.555424	0.0577679	0.00834607	4.46684e-12	47.9081
Autoimmune-related hypothyroidism	rs6914622	T	G	0.254521	0.0716868	0.00949102	4.24913e-14	57.0496
Autoimmune-related hypothyroidism	rs7043516	C	A	0.166059	-0.0998544	0.0113558	1.45312e-18	77.3213
Autoimmune-related hypothyroidism	rs705702	G	A	0.302645	0.0785362	0.00896516	1.94984e-18	76.7403
Autoimmune-related hypothyroidism	rs7090504	A	T	0.238005	0.075812	0.00965662	4.13523e-15	61.6347
Autoimmune-related hypothyroidism	rs713427	C	T	0.221764	0.0571529	0.00992134	8.38166e-09	33.1845
Autoimmune-related hypothyroidism	rs71641308	T	C	0.0964292	0.0837373	0.0139108	1.7486e-09	36.2355
Autoimmune-related hypothyroidism	rs72616654	G	C	0.553169	0.0532175	0.00835012	1.8505e-10	40.6185
Autoimmune-related hypothyroidism	rs72796365	T	C	0.0260409	0.138961	0.0254015	4.48549e-08	29.9273
Autoimmune-related hypothyroidism	rs72866766	C	T	0.0946304	0.0810729	0.0139181	5.71123e-09	33.9306
Autoimmune-related hypothyroidism	rs7321973	A	C	0.295517	0.0814066	0.00901603	1.73101e-19	81.5246
Autoimmune-related hypothyroidism	rs74108950	G	C	0.162434	-0.0641687	0.0114319	1.98724e-08	31.5072
Autoimmune-related hypothyroidism	rs76169968	A	G	0.0989575	-0.0943365	0.0141771	2.84971e-11	44.2777
Autoimmune-related hypothyroidism	rs76653830	T	C	0.102668	0.0754617	0.0134855	2.19675e-08	31.3126
Autoimmune-related hypothyroidism	rs774121	C	T	0.749377	-0.0673027	0.00949342	1.34679e-12	50.2597
Autoimmune-related hypothyroidism	rs7754251	C	G	0.447768	0.0858795	0.00829878	4.25305e-25	107.09
Autoimmune-related hypothyroidism	rs7844425	G	T	0.355567	-0.0520926	0.00870196	2.14664e-09	35.8359
Autoimmune-related hypothyroidism	rs7861040	C	G	0.382575	0.0959192	0.00848807	1.30527e-29	127.701
Autoimmune-related hypothyroidism	rs7861040	C	G	0.382575	0.0959192	0.00848807	1.30527e-29	127.701
Autoimmune-related hypothyroidism	rs7902146	T	C	0.750339	-0.0774861	0.00951006	3.70595e-16	66.3867
Autoimmune-related hypothyroidism	rs79490353	C	T	0.0162547	0.199105	0.0322773	6.88985e-10	38.0513
Autoimmune-related hypothyroidism	rs794999	G	A	0.77136	-0.0666523	0.00979602	1.01742e-11	46.2947
Autoimmune-related hypothyroidism	rs8006310	G	A	0.504402	-0.0536927	0.00829636	9.68055e-11	41.8847
Autoimmune-related hypothyroidism	rs8087237	A	C	0.490285	-0.0482406	0.00831393	6.53793e-09	33.6676
Autoimmune-related hypothyroidism	rs8193	T	C	0.352657	0.0570366	0.00865554	4.40961e-11	43.4229
Autoimmune-related hypothyroidism	rs897586	A	G	0.318214	-0.0630711	0.00895376	1.86681e-12	49.6192
Autoimmune-related hypothyroidism	rs9271365	G	T	0.359077	0.228137	0.00850758	2.11836e-158	719.084
Autoimmune-related hypothyroidism	rs9277535	G	A	0.198178	-0.129707	0.010521	6.37089e-35	151.989
Autoimmune-related hypothyroidism	rs9292	G	A	0.968488	-0.140954	0.0231718	1.1797e-09	37.0029
Autoimmune-related hypothyroidism	rs9713173	G	T	0.384415	-0.107008	0.00856632	8.28896e-36	156.043
Autoimmune-related hypothyroidism	rs9975418	G	A	0.179825	0.0613504	0.010725	1.06333e-08	32.722
Obesity	rs10145461	G	T	0.520141	0.0639401	0.010909	4.59431e-09	34.354
Obesity	rs10938398	A	G	0.472256	0.0789173	0.0108227	3.05844e-13	53.1708
Obesity	rs10973268	G	C	0.549772	-0.063146	0.0108715	6.30681e-09	33.7375
Obesity	rs11030104	G	A	0.166009	-0.102882	0.0148579	4.37925e-12	47.9473
Obesity	rs11184961	G	A	0.629768	0.0628573	0.0112437	2.26511e-08	31.2531
Obesity	rs12639495	C	T	0.173283	0.0799697	0.0141726	1.67529e-08	31.8384
Obesity	rs12967878	C	T	0.181886	0.118835	0.0137104	4.41774e-18	75.1257
Obesity	rs13394970	G	T	0.545199	-0.0609925	0.0108863	2.11086e-08	31.3901
Obesity	rs141145395	C	T	0.585172	0.0645386	0.0110198	4.72389e-09	34.2998
Obesity	rs1429935	C	A	0.492494	-0.0591985	0.0108426	4.76705e-08	29.8095
Obesity	rs1445594	G	A	0.333537	-0.0672044	0.0115887	6.66546e-09	33.6299
Obesity	rs1641154	C	G	0.416522	0.0610205	0.0109566	2.5577e-08	31.017
Obesity	rs1641154	C	G	0.416522	0.0610205	0.0109566	2.5577e-08	31.017
Obesity	rs186989	G	A	0.762415	0.071888	0.0128614	2.27777e-08	31.2418
Obesity	rs2867131	C	T	0.837203	0.130109	0.0151012	6.94544e-18	74.2321
Obesity	rs34783010	T	G	0.258408	-0.0883633	0.012567	2.0455e-12	49.4402
Obesity	rs3798519	C	A	0.212738	0.0943248	0.0129894	3.82384e-13	52.7319
Obesity	rs45551238	T	C	0.0489876	-0.159641	0.0261753	1.06785e-09	37.1968
Obesity	rs5758181	A	G	0.233948	-0.0732154	0.0130018	1.79003e-08	31.7101
Obesity	rs62395884	T	C	0.302975	0.0667543	0.0117435	1.31317e-08	32.312
Obesity	rs67553175	A	G	0.208168	0.106002	0.0131329	6.94384e-16	65.1489
Obesity	rs6759321	T	G	0.347451	-0.0700369	0.0114839	1.06918e-09	37.1942
Obesity	rs7187776	G	A	0.43212	0.0639637	0.0108841	4.18321e-09	34.5368
Obesity	rs7230605	C	T	0.172886	0.0823654	0.0141014	5.19051e-09	34.1166
Obesity	rs8051717	G	A	0.296773	0.0649774	0.0117845	3.5118e-08	30.402
Obesity	rs9928094	G	A	0.428454	0.191146	0.0108026	4.6302e-70	313.093
Body mass index	rs1000940	G	A	0.225	0.0192	0.0034	1.28399e-08	31.8893
Body mass index	rs10132280	A	C	0.3333	-0.023	0.0034	1.14104e-11	45.7612
Body mass index	rs1016287	C	T	0.675	-0.0229	0.0034	2.2532e-11	45.3642
Body mass index	rs10182181	G	A	0.5	0.0307	0.0031	8.77607e-24	98.0739
Body mass index	rs10733682	G	A	0.575	-0.0174	0.0031	1.83e-08	31.5047
Body mass index	rs10938397	G	A	0.4333	0.0402	0.0031	3.20479e-38	168.162
Body mass index	rs10968576	G	A	0.2917	0.0249	0.0033	6.60693e-14	56.9339
Body mass index	rs11030104	G	A	0.2	-0.0414	0.0038	5.55648e-28	118.695
Body mass index	rs11057405	A	G	0.0917	-0.0307	0.0055	2.01902e-08	31.1567
Body mass index	rs11165643	T	C	0.575	0.0218	0.0031	2.07014e-12	49.4527
Body mass index	rs1167827	G	A	0.5417	0.0202	0.0033	6.33301e-10	37.4692
Body mass index	rs11727676	C	T	0.075	-0.0358	0.0064	2.55e-08	31.29
Body mass index	rs12286929	G	A	0.4333	0.0217	0.0031	1.31009e-12	49
Body mass index	rs12429545	A	G	0.1	0.0334	0.0047	1.09396e-12	50.5007
Body mass index	rs12940622	A	G	0.4583	-0.0182	0.0031	2.49402e-09	34.4683
Body mass index	rs12986742	C	T	0.5	0.0212	0.0037	1.006e-08	32.8298
Body mass index	rs13021737	G	A	0.875	0.0601	0.004	1.11301e-50	225.751
Body mass index	rs13078960	G	T	0.1833	0.0297	0.0039	1.737e-14	57.9941
Body mass index	rs13107325	T	C	0.1167	0.0477	0.0068	1.82516e-12	49.2061
Body mass index	rs13191362	G	A	0.2	-0.0277	0.0048	7.33905e-09	33.3025
Body mass index	rs1516725	C	T	0.9083	0.0451	0.0046	1.88582e-22	96.1252
Body mass index	rs1528435	T	C	0.5833	0.0178	0.0031	1.196e-08	32.9698
Body mass index	rs1558902	A	T	0.45	0.0818	0.0031	7.51623e-153	696.279
Body mass index	rs16851483	T	G	0.0917	0.0483	0.0077	3.54797e-10	39.3471
Body mass index	rs16951275	C	T	0.225	-0.0311	0.0037	1.91117e-17	70.6508
Body mass index	rs17001654	G	C	0.1583	0.0306	0.0053	7.75997e-09	33.3343
Body mass index	rs17024393	C	T	0.04167	0.0658	0.0088	7.0291e-14	55.9096
Body mass index	rs17066856	C	T	0.1333	-0.0395	0.0055	6.22444e-13	51.5785
Body mass index	rs17094222	C	T	0.2083	0.0249	0.0038	5.94155e-11	42.937
Body mass index	rs17405819	C	T	0.3667	-0.0224	0.0033	2.07014e-11	46.0753
Body mass index	rs17724992	G	A	0.3083	-0.0194	0.0035	3.41499e-08	30.7233
Body mass index	rs1808579	T	C	0.475	-0.0167	0.0031	4.16898e-08	29.0208
Body mass index	rs1928295	C	T	0.425	-0.0188	0.0031	7.91006e-10	36.7784
Body mass index	rs2033529	G	A	0.2583	0.019	0.0033	1.388e-08	33.1497
Body mass index	rs2033732	C	T	0.7583	0.0192	0.0035	4.889e-08	30.0931
Body mass index	rs205262	G	A	0.2667	0.0221	0.0035	1.75299e-10	39.8702
Body mass index	rs2112347	G	T	0.375	-0.0261	0.0031	6.19156e-17	70.8855
Body mass index	rs2121279	T	C	0.1167	0.0245	0.0044	2.31302e-08	31.0046
Body mass index	rs2176598	C	T	0.8	-0.0198	0.0036	2.97098e-08	30.25
Body mass index	rs2207139	G	A	0.1	0.0447	0.004	4.12572e-29	124.881
Body mass index	rs2245368	T	C	0.7583	-0.0317	0.0057	3.18698e-08	30.9292
Body mass index	rs2287019	T	C	0.15	-0.036	0.0042	4.58458e-18	73.4694
Body mass index	rs2365389	T	C	0.3417	-0.02	0.0031	1.629e-10	41.6233
Body mass index	rs2820292	C	A	0.5083	0.0195	0.0031	1.834e-10	39.5682
Body mass index	rs29941	G	A	0.6667	0.0182	0.0033	2.40702e-08	30.4169
Body mass index	rs3101336	C	T	0.6491	0.0334	0.0031	2.66073e-26	116.083
Body mass index	rs3736485	G	A	0.575	-0.0176	0.0031	7.41208e-09	32.2331
Body mass index	rs3817334	T	C	0.45	0.0262	0.0031	5.14517e-17	71.4298
Body mass index	rs3849570	A	C	0.3667	0.0188	0.0034	2.601e-08	30.5744
Body mass index	rs3888190	A	C	0.3583	0.0309	0.0031	3.13979e-23	99.3559
Body mass index	rs4256980	G	C	0.725	0.0209	0.0031	2.90001e-11	45.4537
Body mass index	rs4740619	C	T	0.4667	-0.0179	0.0031	4.56405e-09	33.3413
Body mass index	rs4889606	G	A	0.3583	-0.0183	0.0031	4.85702e-09	34.8481
Body mass index	rs543874	G	A	0.2667	0.0482	0.0039	2.61818e-35	152.744
Body mass index	rs6477694	T	C	0.6417	-0.0174	0.0031	2.67301e-08	31.5047
Body mass index	rs6567160	C	T	0.2833	0.0556	0.0036	3.93007e-53	238.531
Body mass index	rs657452	G	A	0.5833	-0.0227	0.0031	5.48151e-13	53.6202
Body mass index	rs6656785	G	A	0.3833	0.0217	0.0031	3.82913e-12	49
Body mass index	rs6804842	G	A	0.575	0.0185	0.0031	2.476e-09	35.6139
Body mass index	rs7138803	A	G	0.4417	0.0315	0.0031	8.15267e-24	103.252
Body mass index	rs7141420	T	C	0.6167	0.0235	0.0031	1.22999e-14	57.4662
Body mass index	rs758747	T	C	0.2667	0.0225	0.0037	7.47309e-10	36.9795
Body mass index	rs7599312	A	G	0.2917	-0.022	0.0034	1.17301e-10	41.8685
Body mass index	rs7899106	G	A	0.05	0.0395	0.0071	2.95999e-08	30.9512
Body mass index	rs7903146	T	C	0.25	-0.0234	0.0034	1.11199e-11	47.3668
Body mass index	rs879620	T	C	0.5917	0.0244	0.004	1.06101e-09	37.21
Body mass index	rs9400239	C	T	0.7	0.0188	0.0033	1.61298e-08	32.4555
Body mass index	rs9579083	C	G	0.2333	0.0295	0.0047	3.46099e-10	39.3957
Body mass index	rs9926784	C	T	0.2083	-0.0265	0.0042	1.84901e-10	39.8101
Gastroesophageal reflux disease	rs10014535	G	A	0.547714	0.0437302	0.00984642	8.94479e-06	19.7245
Gastroesophageal reflux disease	rs10204689	C	G	0.0284969	0.131585	0.028375	3.52891e-06	21.5051
Gastroesophageal reflux disease	rs10887132	C	T	0.200384	-0.0546818	0.0123414	9.39074e-06	19.6316
Gastroesophageal reflux disease	rs114620693	G	T	0.0836437	-0.0840745	0.0181672	3.6953e-06	21.4167
Gastroesophageal reflux disease	rs114862906	T	C	0.0117599	0.194343	0.0439824	9.93139e-06	19.5245
Gastroesophageal reflux disease	rs117291711	A	G	0.00345994	0.346773	0.0756236	4.52898e-06	21.0269
Gastroesophageal reflux disease	rs117654033	C	A	0.0112724	-0.221631	0.0489998	6.09425e-06	20.4584
Gastroesophageal reflux disease	rs12315638	T	C	0.376589	-0.0491104	0.0101139	1.19939e-06	23.5781
Gastroesophageal reflux disease	rs12759463	G	A	0.490199	-0.0498746	0.00977648	3.36992e-07	26.0252
Gastroesophageal reflux disease	rs13242744	C	T	0.0342202	-0.143096	0.0287429	6.40855e-07	24.7853
Gastroesophageal reflux disease	rs13425669	G	A	0.451416	-0.0443557	0.00988161	7.16539e-06	20.1485
Gastroesophageal reflux disease	rs141158485	T	C	0.0324006	-0.133937	0.0291983	4.49324e-06	21.042
Gastroesophageal reflux disease	rs150455944	T	C	0.0106795	-0.253492	0.0504684	5.09261e-07	25.2284
Gastroesophageal reflux disease	rs1549726	G	A	0.371149	0.0478045	0.0100886	2.15338e-06	22.4531
Gastroesophageal reflux disease	rs1765252	C	T	0.549455	0.0475069	0.00989639	1.58329e-06	23.0441
Gastroesophageal reflux disease	rs1817798	C	T	0.78662	0.0573448	0.0121526	2.37329e-06	22.2664
Gastroesophageal reflux disease	rs2142302	C	G	0.130728	-0.0663823	0.0147152	6.44837e-06	20.3504
Gastroesophageal reflux disease	rs224457	T	C	0.942279	-0.0947519	0.0208647	5.59191e-06	20.623
Gastroesophageal reflux disease	rs2572929	T	A	0.836461	-0.0598519	0.0132794	6.57083e-06	20.3142
Gastroesophageal reflux disease	rs2698712	A	G	0.580607	0.0459866	0.00999611	4.2158e-06	21.1641
Gastroesophageal reflux disease	rs2993831	C	T	0.515566	-0.0471812	0.0099188	1.96739e-06	22.6266
Gastroesophageal reflux disease	rs34929116	A	G	0.426613	0.0457754	0.00997051	4.40951e-06	21.078
Gastroesophageal reflux disease	rs35544387	C	T	0.0219882	0.148656	0.0318952	3.15021e-06	21.7227
Gastroesophageal reflux disease	rs36110110	C	A	0.00319555	0.370873	0.0816349	5.54396e-06	20.6395
Gastroesophageal reflux disease	rs3793306	A	C	0.191793	0.0553741	0.0123044	6.78375e-06	20.2531
Gastroesophageal reflux disease	rs4269485	G	A	0.540485	-0.051124	0.0098218	1.93834e-07	27.0936
Gastroesophageal reflux disease	rs4725102	C	T	0.979782	0.166179	0.037088	7.44132e-06	20.0764
Gastroesophageal reflux disease	rs55796887	T	C	0.610928	-0.0456252	0.0100222	5.30322e-06	20.7245
Gastroesophageal reflux disease	rs57670756	A	G	0.153826	0.0618827	0.0134598	4.27386e-06	21.1379
Gastroesophageal reflux disease	rs59479924	T	C	0.0337073	0.117997	0.0264543	8.18013e-06	19.8952
Gastroesophageal reflux disease	rs59486993	T	C	0.0260336	0.144803	0.0300749	1.47384e-06	23.1818
Gastroesophageal reflux disease	rs61459905	T	C	0.121357	-0.0739478	0.0152389	1.21874e-06	23.5474
Gastroesophageal reflux disease	rs62071866	A	G	0.424366	-0.0439834	0.00992187	9.29416e-06	19.6513
Gastroesophageal reflux disease	rs62575049	A	G	0.0142539	0.185701	0.0399151	3.28088e-06	21.6448
Gastroesophageal reflux disease	rs62575049	A	G	0.0142539	0.185701	0.0399151	3.28088e-06	21.6448
Gastroesophageal reflux disease	rs67477437	G	A	0.284443	-0.0514241	0.0109426	2.60849e-06	22.0847
Gastroesophageal reflux disease	rs720269	A	T	0.119296	-0.0731016	0.0153505	1.91536e-06	22.6782
Gastroesophageal reflux disease	rs72691578	T	C	0.033605	-0.128382	0.0285427	6.86294e-06	20.231
Gastroesophageal reflux disease	rs72736874	A	T	0.0231533	0.14151	0.0320221	9.90946e-06	19.5288
Gastroesophageal reflux disease	rs72770331	G	A	0.0777029	-0.0838406	0.0187517	7.7818e-06	19.9907
Gastroesophageal reflux disease	rs72850646	G	A	0.014048	0.180806	0.0394303	4.52991e-06	21.0264
Gastroesophageal reflux disease	rs72942967	G	A	0.0308502	-0.131995	0.0293342	6.80519e-06	20.2473
Gastroesophageal reflux disease	rs73601836	T	C	0.0560766	0.0927125	0.0208241	8.5008e-06	19.8218
Gastroesophageal reflux disease	rs73925240	T	G	0.111386	0.0701214	0.0153892	5.20056e-06	20.762
Gastroesophageal reflux disease	rs75069439	A	G	0.0223771	-0.159573	0.0345319	3.81848e-06	21.3539
Gastroesophageal reflux disease	rs76391590	A	G	0.0157394	0.186957	0.038496	1.19465e-06	23.5859
Gastroesophageal reflux disease	rs77709037	A	G	0.194616	-0.0590904	0.0128116	3.98309e-06	21.2729
Gastroesophageal reflux disease	rs7795097	A	C	0.0546759	0.0956751	0.0208913	4.65736e-06	20.9733
Gastroesophageal reflux disease	rs79348626	A	G	0.0172506	0.182377	0.0354743	2.73118e-07	26.4309
Gastroesophageal reflux disease	rs7947529	T	C	0.748467	0.050481	0.0113817	9.19539e-06	19.6717
Gastroesophageal reflux disease	rs79646167	G	T	0.0565948	0.0919545	0.0207293	9.16621e-06	19.6778
Gastroesophageal reflux disease	rs9318574	C	T	0.807762	0.0572754	0.0126376	5.83875e-06	20.5403
Peptic ulcer	rs10000940	A	T	0.00049507	1.15883	0.259829	8.19634e-06	19.8913
Peptic ulcer	rs10174888	A	C	0.60775	0.0829761	0.0165059	4.98035e-07	25.2713
Peptic ulcer	rs10878224	T	C	0.42926	-0.0756419	0.0162166	3.094e-06	21.7573
Peptic ulcer	rs10919960	C	T	0.337788	-0.0757608	0.0170574	8.93264e-06	19.7271
Peptic ulcer	rs116250390	G	A	0.0484921	-0.176302	0.0391501	6.69252e-06	20.2791
Peptic ulcer	rs117665817	G	T	0.0343865	-0.208417	0.0466802	8.01493e-06	19.9343
Peptic ulcer	rs12274456	T	C	0.218308	0.103537	0.0189929	4.99873e-08	29.7172
Peptic ulcer	rs13220094	T	C	0.237386	0.0905046	0.0185615	1.08298e-06	23.7747
Peptic ulcer	rs13537	A	G	0.508983	-0.0779467	0.0160623	1.21745e-06	23.5494
Peptic ulcer	rs140499900	T	A	0.0040086	0.493744	0.109097	6.01866e-06	20.4823
Peptic ulcer	rs16920944	A	G	0.279288	-0.0874271	0.018016	1.21762e-06	23.5492
Peptic ulcer	rs2294008	T	C	0.502288	-0.110295	0.0159654	4.90343e-12	47.7257
Peptic ulcer	rs28446901	G	C	0.237686	-0.114183	0.0190867	2.19963e-09	35.7883
Peptic ulcer	rs3770102	T	G	0.408652	0.0716598	0.0161878	9.56555e-06	19.5964
Peptic ulcer	rs4492206	G	A	0.124572	-0.121362	0.0248896	1.08241e-06	23.7755
Peptic ulcer	rs4672499	C	T	0.124499	0.113484	0.0236347	1.57438e-06	23.0552
Peptic ulcer	rs56204113	G	A	0.0247334	-0.255559	0.0552291	3.70553e-06	21.4115
Peptic ulcer	rs62135681	A	C	0.00617439	-1.01613	0.226196	7.04726e-06	20.1804
Peptic ulcer	rs73054079	T	C	0.290358	-0.0870123	0.0180752	1.48003e-06	23.1737
Peptic ulcer	rs73176966	C	T	0.0181527	0.269788	0.0570828	2.28702e-06	22.3375
Peptic ulcer	rs7326914	G	A	0.824643	0.10218	0.0215203	2.05381e-06	22.5442
Peptic ulcer	rs74790091	A	G	0.244666	0.0831488	0.018404	6.24353e-06	20.4121
Peptic ulcer	rs75021466	C	T	0.0406521	-0.190403	0.0427404	8.39421e-06	19.8459
Peptic ulcer	rs7851933	T	G	0.0302513	0.237748	0.04372	5.38964e-08	29.5715
Peptic ulcer	rs78904157	C	T	0.00960357	0.334179	0.0746357	7.55336e-06	20.0477
Peptic ulcer	rs8089299	T	A	0.104129	0.116643	0.0255797	5.1154e-06	20.7934
Peptic ulcer	rs9522500	T	C	0.948797	0.185014	0.0384525	1.49803e-06	23.1505
Irritable bowel syndrome	rs111344672	T	C	0.0050382	0.459135	0.0999376	4.3438e-06	21.1068
Irritable bowel syndrome	rs115354969	A	G	0.0144785	-0.357638	0.074834	1.76096e-06	22.8396
Irritable bowel syndrome	rs116401159	A	G	0.0374382	-0.206025	0.045052	4.80695e-06	20.9128
Irritable bowel syndrome	rs116870154	C	G	0.0400805	0.191302	0.0388374	8.40504e-07	24.2627
Irritable bowel syndrome	rs11807089	T	C	0.271997	0.0857414	0.0178129	1.48361e-06	23.1692
Irritable bowel syndrome	rs118188507	T	C	0.0147492	0.313427	0.0617145	3.80111e-07	25.7928
Irritable bowel syndrome	rs142706235	T	A	0.0382587	-0.202133	0.0446378	5.94593e-06	20.5054
Irritable bowel syndrome	rs143609717	A	G	0.00888773	-0.438334	0.0975935	7.07473e-06	20.1729
Irritable bowel syndrome	rs149378059	A	C	0.0974584	0.119619	0.0263752	5.75228e-06	20.5688
Irritable bowel syndrome	rs1989447	A	C	0.243237	0.0923298	0.0184535	5.63352e-07	25.0338
Irritable bowel syndrome	rs34638686	T	C	0.123117	0.112674	0.0237175	2.02736e-06	22.5689
Irritable bowel syndrome	rs4345097	C	T	0.781764	0.0913197	0.0197095	3.59915e-06	21.4673
Irritable bowel syndrome	rs569542	G	A	0.826554	-0.0976391	0.0207022	2.40104e-06	22.2441
Irritable bowel syndrome	rs62541875	G	A	0.1203	0.109574	0.0240765	5.33691e-06	20.7123
Irritable bowel syndrome	rs7016453	A	G	0.223643	0.0836269	0.018889	9.54267e-06	19.6008
Irritable bowel syndrome	rs7080005	A	G	0.973799	0.266801	0.0545205	9.90102e-07	23.9472
Irritable bowel syndrome	rs72831330	G	C	0.210283	-0.0890514	0.0200937	9.3448e-06	19.6409
Irritable bowel syndrome	rs73267275	A	T	0.00385299	0.51099	0.111353	4.45502e-06	21.0582
Irritable bowel syndrome	rs74687761	C	G	0.0505293	0.166207	0.0351395	2.24595e-06	22.3721
Irritable bowel syndrome	rs74795993	A	C	0.0527515	0.15886	0.03462	4.46077e-06	21.056
Irritable bowel syndrome	rs75181063	A	C	0.0380013	-0.211504	0.0448798	2.44495e-06	22.2093
Irritable bowel syndrome	rs7547481	C	T	0.0577929	0.15689	0.033383	2.60567e-06	22.0872
Irritable bowel syndrome	rs77122573	A	G	0.00230633	0.637685	0.142049	7.14974e-06	20.1528
Irritable bowel syndrome	rs79296260	C	T	0.0342874	0.19036	0.0425029	7.50793e-06	20.0592
Irritable bowel syndrome	rs80296482	T	C	0.0140216	-0.337585	0.0751698	7.09022e-06	20.1688
Irritable bowel syndrome	rs8039669	A	G	0.0419208	-0.191713	0.0419738	4.93696e-06	20.8615
Irritable bowel syndrome	rs892023	G	A	0.382554	0.0776462	0.0163483	2.0392e-06	22.5577
Irritable bowel syndrome	rs9583337	A	G	0.331668	0.0809941	0.0168733	1.58551e-06	23.0413
Irritable bowel syndrome	rs9590023	G	T	0.363492	-0.0768453	0.0167858	4.69451e-06	20.958
Ulcerative colitis	rs10185424	G	T	0.5396	-0.0965995	0.0125621	1.47367e-14	59.1324
Ulcerative colitis	rs10460566	A	G	0.7611	-0.0817673	0.0144699	1.59643e-08	31.9322
Ulcerative colitis	rs10748783	A	C	0.5237	-0.164756	0.0126394	7.73393e-39	169.914
Ulcerative colitis	rs10758669	A	C	0.6504	-0.143218	0.0128828	1.03753e-28	123.588
Ulcerative colitis	rs10761659	G	A	0.5399	0.117315	0.0126238	1.49796e-20	86.3628
Ulcerative colitis	rs1077773	A	G	0.5238	0.0721282	0.012398	5.96458e-09	33.846
Ulcerative colitis	rs10910092	G	A	0.4676	-0.0863506	0.0127821	1.42266e-11	45.638
Ulcerative colitis	rs11083840	G	T	0.4025	0.0691316	0.0125262	3.41036e-08	30.4589
Ulcerative colitis	rs11150589	C	T	0.5268	-0.0798521	0.0127057	3.28398e-10	39.498
Ulcerative colitis	rs111830527	A	G	0.05254	-0.192324	0.0292804	5.08745e-11	43.1433
Ulcerative colitis	rs11229555	T	G	0.2515	-0.0823351	0.0144507	1.2147e-08	32.4633
Ulcerative colitis	rs11230563	T	C	0.348	-0.0750666	0.0133556	1.90296e-08	31.5912
Ulcerative colitis	rs11641184	A	C	0.4762	0.0780232	0.0124939	4.24043e-10	38.9988
Ulcerative colitis	rs11676348	T	C	0.4763	0.0744362	0.0124232	2.07678e-09	35.9006
Ulcerative colitis	rs11793497	G	A	0.423	0.134108	0.0125921	1.7398e-26	113.426
Ulcerative colitis	rs1182188	C	T	0.2989	-0.107615	0.0137507	5.03153e-15	61.2486
Ulcerative colitis	rs12103	C	T	0.8166	-0.0995588	0.0162944	9.96369e-10	37.3321
Ulcerative colitis	rs12318183	A	C	0.3854	0.162178	0.0126604	1.44278e-37	164.093
Ulcerative colitis	rs12718244	A	G	0.4081	0.0717762	0.0126545	1.4115e-08	32.1715
Ulcerative colitis	rs12720356	C	A	0.08572	0.153279	0.0227683	1.67225e-11	45.3215
Ulcerative colitis	rs12796489	A	C	0.02286	-0.67649	0.0559623	1.21787e-33	146.127
Ulcerative colitis	rs1297256	T	C	0.4249	-0.10106	0.0127351	2.09604e-15	62.9729
Ulcerative colitis	rs13136827	C	T	0.1622	-0.111814	0.0176452	2.34542e-10	40.155
Ulcerative colitis	rs13255292	T	C	0.3284	-0.075463	0.0137225	3.81514e-08	30.2414
Ulcerative colitis	rs13430791	A	G	0.1202	0.105886	0.0186614	1.39422e-08	32.195
Ulcerative colitis	rs1359946	A	G	0.1824	0.131438	0.0158185	9.63829e-17	69.0417
Ulcerative colitis	rs140143	T	G	0.3897	-0.129716	0.0143011	1.18631e-19	82.2713
Ulcerative colitis	rs1517352	C	A	0.6048	0.0777839	0.0129859	2.09991e-09	35.8786
Ulcerative colitis	rs16841904	T	C	0.2028	0.0860225	0.015305	1.90349e-08	31.5906
Ulcerative colitis	rs17694108	A	G	0.2797	0.0958444	0.0139396	6.16737e-12	47.2751
Ulcerative colitis	rs17780256	C	A	0.1927	-0.115389	0.0160316	6.12774e-13	51.8054
Ulcerative colitis	rs1801274	G	A	0.4958	-0.170896	0.012653	1.4345e-41	182.422
Ulcerative colitis	rs1990760	T	C	0.6085	-0.0855732	0.0134145	1.7809e-10	40.6936
Ulcerative colitis	rs2274351	T	C	0.5373	0.0710979	0.0130334	4.89531e-08	29.7576
Ulcerative colitis	rs2497318	T	C	0.4504	-0.0714375	0.0125164	1.14641e-08	32.5757
Ulcerative colitis	rs2516440	A	G	0.3222	-0.0997745	0.0137762	4.40352e-13	52.4542
Ulcerative colitis	rs272882	T	G	0.6733	0.145856	0.0138588	6.66807e-26	110.764
Ulcerative colitis	rs2836883	A	G	0.2728	-0.227134	0.0147424	1.47333e-53	237.371
Ulcerative colitis	rs3024493	A	C	0.1572	0.226278	0.0163471	1.41971e-43	191.603
Ulcerative colitis	rs34659678	T	C	0.05734	0.209947	0.0250948	5.95251e-17	69.9926
Ulcerative colitis	rs35223180	T	G	0.1791	-0.141003	0.0175766	1.0392e-15	64.3557
Ulcerative colitis	rs36070529	A	G	0.1999	-0.091704	0.0160211	1.04073e-08	32.7636
Ulcerative colitis	rs3774937	C	T	0.3257	0.099276	0.0131621	4.60787e-14	56.8903
Ulcerative colitis	rs3776414	G	T	0.3756	0.0704798	0.0128464	4.10346e-08	30.1
Ulcerative colitis	rs4366152	C	T	0.68	0.120371	0.0135814	7.79471e-19	78.5515
Ulcerative colitis	rs4380874	C	T	0.5907	-0.130874	0.0126952	6.4254e-25	106.274
Ulcerative colitis	rs4456788	A	G	0.6106	-0.102758	0.0127344	7.06968e-16	65.114
Ulcerative colitis	rs4656958	G	A	0.6821	0.0824158	0.0138702	2.8167e-09	35.3066
Ulcerative colitis	rs4676410	A	G	0.2038	0.142022	0.0157426	1.85481e-19	81.3876
Ulcerative colitis	rs4712520	C	T	0.8182	0.0929892	0.0166206	2.20841e-08	31.302
Ulcerative colitis	rs4728142	A	G	0.439	0.0969671	0.0126655	1.91823e-14	58.6144
Ulcerative colitis	rs4743820	T	C	0.7019	0.0809228	0.0137572	4.04772e-09	34.6004
Ulcerative colitis	rs4747886	T	C	0.4081	0.0738479	0.0128701	9.58341e-09	32.924
Ulcerative colitis	rs4795397	G	A	0.4713	0.139853	0.012577	1.00624e-28	123.649
Ulcerative colitis	rs4812833	A	G	0.5188	0.103346	0.0125571	1.87068e-16	67.7343
Ulcerative colitis	rs483905	A	G	0.289	0.0849927	0.0135107	3.15929e-10	39.5738
Ulcerative colitis	rs4947328	G	A	0.02366	0.239455	0.038129	3.38314e-10	39.44
Ulcerative colitis	rs4973341	T	C	0.6627	0.073473	0.0131405	2.25336e-08	31.2631
Ulcerative colitis	rs4976646	C	T	0.3415	0.0787748	0.0132165	2.51721e-09	35.5256
Ulcerative colitis	rs55808324	A	G	0.09318	0.127209	0.021035	1.47092e-09	36.5722
Ulcerative colitis	rs56167332	A	C	0.3375	0.141368	0.0131737	7.2711e-27	115.156
Ulcerative colitis	rs59418206	A	G	0.3508	0.0735513	0.012978	1.45001e-08	32.1192
Ulcerative colitis	rs59655222	C	T	0.2809	-0.166889	0.0143787	3.80978e-31	134.715
Ulcerative colitis	rs6062496	A	G	0.5694	0.113898	0.0128769	9.13903e-19	78.2365
Ulcerative colitis	rs6111031	T	C	0.1591	-0.260863	0.0190685	1.33137e-42	187.151
Ulcerative colitis	rs61893460	A	G	0.4447	0.121119	0.0125424	4.60363e-22	93.2531
Ulcerative colitis	rs6426833	A	G	0.536	0.232387	0.0125836	3.77051e-76	341.047
Ulcerative colitis	rs661054	G	A	0.3408	-0.124858	0.0135529	3.18273e-20	84.8728
Ulcerative colitis	rs6920220	A	G	0.2086	0.146936	0.015222	4.77969e-22	93.1779
Ulcerative colitis	rs7240004	G	A	0.3795	-0.0823655	0.0130179	2.49862e-10	40.0321
Ulcerative colitis	rs7404095	C	T	0.5796	0.0717686	0.0126826	1.52416e-08	32.0223
Ulcerative colitis	rs7547569	C	T	0.06675	-0.495701	0.0291648	8.70964e-65	288.883
Ulcerative colitis	rs7608910	G	A	0.3909	0.127099	0.0126851	1.25026e-23	100.391
Ulcerative colitis	rs76546301	A	G	0.01822	0.26496	0.0410174	1.04918e-10	41.7277
Ulcerative colitis	rs76904798	T	C	0.1368	0.104624	0.0176013	2.77984e-09	35.3324
Ulcerative colitis	rs7711427	C	A	0.613	0.088938	0.0127983	3.67367e-12	48.2914
Ulcerative colitis	rs7738430	C	T	0.02624	0.367964	0.0340763	3.50913e-27	116.602
Ulcerative colitis	rs79045992	A	G	0.1033	0.118093	0.02083	1.43321e-08	32.1418
Ulcerative colitis	rs8096327	G	A	0.3839	0.093806	0.0127914	2.24233e-13	53.7805
Ulcerative colitis	rs8096327	G	A	0.3839	0.093806	0.0127914	2.24233e-13	53.7805
Ulcerative colitis	rs913678	C	T	0.3293	-0.0757579	0.013301	1.22914e-08	32.4405
Ulcerative colitis	rs9271255	T	C	0.732	-0.284959	0.013809	1.31009e-94	425.834
Ulcerative colitis	rs9271858	G	A	0.511	0.122709	0.0129368	2.41769e-21	89.9703
Ulcerative colitis	rs941823	C	T	0.7509	0.108669	0.0146906	1.39155e-13	54.7183
Ulcerative colitis	rs9611131	C	T	0.1477	-0.142696	0.0181548	3.84326e-15	61.779
Ulcerative colitis	rs9836291	A	G	0.2878	0.170257	0.0132458	8.19785e-38	165.217
Ulcerative colitis	rs9891119	C	A	0.3536	-0.0895467	0.0133101	1.72346e-11	45.2623
Ulcerative colitis	rs9941524	G	A	0.4559	0.0977156	0.0127881	2.15278e-14	58.3869
Crohn's disease	rs10758669	A	C	0.6504	-0.14975	0.012299	4.19e-34	148.25
Crohn's disease	rs10798069	T	G	0.4925	-0.070387	0.0119822	4.25e-09	34.5074
Crohn's disease	rs10800309	G	A	0.6578	-0.0904086	0.0126389	8.48e-13	51.1683
Crohn's disease	rs11117431	G	A	0.1978	-0.14927	0.0164404	1.09e-19	82.4366
Crohn's disease	rs11152949	G	A	0.3195	0.133849	0.0128549	2.18e-25	108.416
Crohn's disease	rs11159833	T	C	0.08681	0.155227	0.0207601	7.59e-14	55.9082
Crohn's disease	rs11167518	A	C	0.08143	0.279727	0.0198222	3.21e-45	199.143
Crohn's disease	rs11175963	T	C	0.07155	-0.157847	0.0240031	4.83e-11	43.2452
Crohn's disease	rs11185982	C	T	0.1517	-0.109139	0.0168972	1.05e-10	41.7187
Crohn's disease	rs11236797	A	C	0.4444	0.180737	0.0120572	8.54e-51	224.699
Crohn's disease	rs11691685	G	A	0.08024	-0.157687	0.0233162	1.35e-11	45.7379
Crohn's disease	rs11713774	C	T	0.1427	0.132662	0.0171654	1.09e-14	59.729
Crohn's disease	rs11768997	T	G	0.1346	0.226326	0.0208449	1.83e-27	117.888
Crohn's disease	rs11793497	G	A	0.423	0.168922	0.0121801	9.8e-44	192.34
Crohn's disease	rs12131796	A	G	0.2804	-0.149913	0.0137993	1.71e-27	118.022
Crohn's disease	rs12411259	A	G	0.2401	0.134364	0.0137443	1.43e-22	95.5698
Crohn's disease	rs1250573	A	G	0.3155	-0.141693	0.0134477	5.86e-26	111.02
Crohn's disease	rs1267501	C	T	0.8106	0.0871787	0.0151984	9.69e-09	32.9022
Crohn's disease	rs12694846	G	A	0.2593	0.115366	0.0136242	2.5e-17	71.7024
Crohn's disease	rs12766391	A	G	0.3906	0.18718	0.0122458	9.59e-53	233.639
Crohn's disease	rs12796489	A	C	0.02286	-0.79177	0.0526931	4.96e-51	225.783
Crohn's disease	rs1292053	G	A	0.442	0.0911854	0.0118917	1.75e-14	58.798
Crohn's disease	rs12949918	C	T	0.4185	-0.104177	0.0123587	3.47e-17	71.0556
Crohn's disease	rs1297258	T	C	0.4249	-0.127246	0.0122169	2.11e-25	108.484
Crohn's disease	rs13001325	T	C	0.3757	-0.122687	0.0125708	1.68e-22	95.2514
Crohn's disease	rs13407913	G	A	0.4306	0.114508	0.0119519	9.64e-22	91.7905
Crohn's disease	rs1363907	A	G	0.4212	0.102575	0.0125984	3.89e-16	66.2906
Crohn's disease	rs140143	T	G	0.3897	-0.126945	0.013562	7.95e-21	87.6161
Crohn's disease	rs1456896	T	C	0.6894	0.0977081	0.0131392	1.03e-13	55.2998
Crohn's disease	rs1517352	C	A	0.6048	0.0800097	0.0124517	1.31e-10	41.2884
Crohn's disease	rs1569328	T	C	0.1702	-0.109215	0.0167191	6.47e-11	42.6716
Crohn's disease	rs1646019	T	C	0.303	-0.111379	0.013383	8.62e-17	69.2627
Crohn's disease	rs17129991	T	C	0.02246	-0.284461	0.0450901	2.81e-10	39.8
Crohn's disease	rs17293632	T	C	0.2364	0.128384	0.0139602	3.7e-20	84.5743
Crohn's disease	rs17391694	T	C	0.1226	-0.119051	0.0199954	2.62e-09	35.4492
Crohn's disease	rs17622378	G	A	0.4186	0.190197	0.0120781	7.17e-56	247.976
Crohn's disease	rs17694108	A	G	0.2797	0.0795895	0.0134523	3.29e-09	35.0041
Crohn's disease	rs181826	A	C	0.6266	0.0995948	0.0127047	4.53e-15	61.4532
Crohn's disease	rs1847472	A	C	0.3421	-0.0853854	0.0132299	1.09e-10	41.6538
Crohn's disease	rs2024092	A	G	0.2162	0.147664	0.0143378	7.13e-25	106.068
Crohn's disease	rs212388	T	C	0.6043	-0.102377	0.0124319	1.8e-16	67.8156
Crohn's disease	rs2227551	T	G	0.7288	0.0994456	0.0137489	4.72e-13	52.3161
Crohn's disease	rs2270395	T	C	0.7616	0.124328	0.0144786	8.93e-18	73.7369
Crohn's disease	rs2284553	G	A	0.5904	0.103192	0.0123247	5.63e-17	70.1034
Crohn's disease	rs2395022	C	A	0.95885	-0.177152	0.0281553	3.13e-10	39.5888
Crohn's disease	rs2413583	T	C	0.1654	-0.210407	0.0168361	7.72e-36	156.184
Crohn's disease	rs2488389	A	G	0.2092	0.112584	0.014511	8.59e-15	60.1948
Crohn's disease	rs2538470	G	A	0.6378	-0.0749643	0.0122847	1.05e-09	37.2374
Crohn's disease	rs259964	G	A	0.5414	-0.0713342	0.0119064	2.08e-09	35.8951
Crohn's disease	rs2641348	G	A	0.1077	-0.121336	0.0198422	9.65e-10	37.3938
Crohn's disease	rs26528	C	T	0.4576	0.119845	0.0122466	1.29e-22	95.7654
Crohn's disease	rs2790241	T	G	0.2195	-0.0968433	0.0154101	3.29e-10	39.4937
Crohn's disease	rs2847278	T	C	0.841	-0.167426	0.0159039	6.46e-26	110.825
Crohn's disease	rs28999107	T	G	0.4387	0.0856594	0.0126539	1.29e-11	45.8249
Crohn's disease	rs2974935	T	G	0.4948	0.0755507	0.0121937	5.8e-10	38.3889
Crohn's disease	rs3024505	A	G	0.1573	0.165311	0.0159634	3.95e-25	107.239
Crohn's disease	rs303429	T	C	0.5997	0.0762756	0.0124275	8.38e-10	37.6707
Crohn's disease	rs3129871	C	A	0.6601	-0.087922	0.0130803	1.8e-11	45.1814
Crohn's disease	rs3184504	C	T	0.5074	-0.067651	0.0119969	1.71e-08	31.7988
Crohn's disease	rs3197999	A	G	0.2812	0.155114	0.0128775	2.05e-33	145.09
Crohn's disease	rs34592089	A	G	0.05297	0.199406	0.0249741	1.41e-15	63.7524
Crohn's disease	rs34779708	G	T	0.3512	0.134457	0.0123872	1.9e-27	117.82
Crohn's disease	rs34787213	T	C	0.1401	-0.14973	0.0183059	2.85e-16	66.9014
Crohn's disease	rs34804116	A	C	0.3867	-0.0939086	0.0126747	1.27e-13	54.8953
Crohn's disease	rs35164067	A	G	0.2039	-0.143373	0.015563	3.19e-20	84.8688
Crohn's disease	rs35320439	C	T	0.3104	0.0840555	0.0137546	9.89e-10	37.3453
Crohn's disease	rs36016881	G	A	0.1754	-0.108961	0.0170379	1.6e-10	40.8987
Crohn's disease	rs3776414	G	T	0.3756	0.0888353	0.012297	5.04e-13	52.1883
Crohn's disease	rs3801810	A	G	0.2337	0.105079	0.01402	6.63e-14	56.1741
Crohn's disease	rs3853824	C	T	0.6385	0.0813612	0.0126283	1.17e-10	41.5093
Crohn's disease	rs438475	A	G	0.1322	0.159076	0.0172814	3.42e-20	84.7328
Crohn's disease	rs4703855	T	C	0.2998	-0.073261	0.0132248	3.03e-08	30.6879
Crohn's disease	rs4795397	G	A	0.4713	0.132338	0.0120311	3.84e-28	120.993
Crohn's disease	rs516246	T	C	0.4652	0.114576	0.0123121	1.33e-20	86.601
Crohn's disease	rs559928	C	T	0.8128	0.099124	0.0158237	3.75e-10	39.2411
Crohn's disease	rs56163845	G	A	0.3096	-0.091908	0.0134853	9.4e-12	46.45
Crohn's disease	rs6062496	A	G	0.5694	0.120078	0.0124099	3.82e-22	93.6247
Crohn's disease	rs6074022	T	C	0.7497	-0.0963211	0.0137745	2.7e-12	48.898
Crohn's disease	rs6111031	T	C	0.1591	-0.282366	0.018121	9.61e-55	242.807
Crohn's disease	rs61839660	T	C	0.08983	0.148159	0.0203346	3.19e-13	53.0866
Crohn's disease	rs640466	C	T	0.3739	-0.0758092	0.0124963	1.31e-09	36.8028
Crohn's disease	rs6456426	A	C	0.4984	-0.0991795	0.0119962	1.37e-16	68.3528
Crohn's disease	rs6500315	G	A	0.7753	0.145539	0.0146056	2.18e-23	99.2933
Crohn's disease	rs6556417	G	A	0.8404	0.155097	0.0172125	2.05e-19	81.1931
Crohn's disease	rs6561151	A	G	0.2235	0.147148	0.0142318	4.68e-25	106.903
Crohn's disease	rs6651252	C	T	0.13	-0.149029	0.0183017	3.86e-16	66.3069
Crohn's disease	rs6679677	A	C	0.09755	-0.185152	0.0220556	4.67e-17	70.4724
Crohn's disease	rs6738394	A	G	0.4519	0.0777406	0.011991	8.98e-11	42.0325
Crohn's disease	rs6738490	C	T	0.5274	0.226164	0.0120892	4.26e-78	349.987
Crohn's disease	rs6740462	A	C	0.7378	0.099737	0.0141387	1.74e-12	49.7615
Crohn's disease	rs6827756	C	T	0.6251	-0.0789645	0.0125632	3.27e-10	39.506
Crohn's disease	rs6908425	C	T	0.7843	0.103988	0.0150464	4.81e-12	47.7641
Crohn's disease	rs7015630	C	T	0.2657	-0.0842498	0.0137523	9e-10	37.5307
Crohn's disease	rs7085798	A	C	0.5176	-0.174348	0.0120372	1.53e-47	209.789
Crohn's disease	rs71624119	A	G	0.2422	-0.0923221	0.0149485	6.57e-10	38.1431
Crohn's disease	rs7194886	T	C	0.4357	-0.226986	0.0121749	1.42e-77	347.59
Crohn's disease	rs7236492	T	C	0.1537	-0.0996611	0.017342	9.09e-09	33.0258
Crohn's disease	rs72727394	T	C	0.2007	0.103233	0.0149661	5.28e-12	47.5795
Crohn's disease	rs727563	T	C	0.7973	-0.0921252	0.014461	1.88e-10	40.5845
Crohn's disease	rs7438704	G	A	0.6435	0.0839019	0.0126601	3.42e-11	43.9207
Crohn's disease	rs7517847	G	T	0.4352	-0.335814	0.0124758	1.38e-159	724.537
Crohn's disease	rs7608910	G	A	0.3909	0.120609	0.0121405	2.95e-23	98.693
Crohn's disease	rs76906269	G	A	0.01883	0.394341	0.0370279	1.75e-26	113.419
Crohn's disease	rs7711427	C	A	0.613	0.24803	0.0124713	5.17e-88	395.535
Crohn's disease	rs7773324	A	G	0.6002	0.078744	0.012909	1.06e-09	37.2091
Crohn's disease	rs7786444	T	C	0.1163	0.112085	0.0183382	9.83e-10	37.3578
Crohn's disease	rs77981966	T	C	0.07271	0.182656	0.0222451	2.19e-16	67.4216
Crohn's disease	rs780094	C	T	0.6051	-0.116483	0.0120611	4.56e-22	93.272
Crohn's disease	rs7848647	C	T	0.6746	0.141308	0.0129961	1.55e-27	118.224
Crohn's disease	rs7969592	G	A	0.4746	-0.0731898	0.011991	1.04e-09	37.2555
Crohn's disease	rs79980175	C	A	0.136	-0.134258	0.0182147	1.7e-13	54.3296
Crohn's disease	rs8127691	C	T	0.6132	-0.123357	0.0121887	4.48e-24	102.427
Crohn's disease	rs915286	A	G	0.5488	0.066645	0.0119709	2.59e-08	30.9943
Crohn's disease	rs921720	G	A	0.6188	0.118254	0.0123632	1.12e-21	91.4892
Crohn's disease	rs9264942	C	T	0.3529	0.150794	0.0128298	6.78e-32	138.143
Crohn's disease	rs9457247	T	C	0.5398	0.123663	0.0124045	2.08e-23	99.385
Crohn's disease	rs9491892	G	T	0.1496	0.137869	0.0163762	3.8e-17	70.8773
Crohn's disease	rs9494844	A	C	0.2519	-0.088944	0.0142376	4.18e-10	39.0265
Crohn's disease	rs9554587	G	A	0.2242	-0.0951561	0.0146501	8.29e-11	42.1883
Crohn's disease	rs9594766	A	G	0.5294	-0.0735547	0.0121434	1.39e-09	36.6894
Crohn's disease	rs9889296	A	G	0.2723	-0.143097	0.0137815	2.96e-25	107.812
Depression	rs1027190	G	T	0.722435	-0.0494412	0.00888066	2.58732e-08	30.9947
Depression	rs12479064	T	C	0.16896	0.0578229	0.0105413	4.12591e-08	30.0893
Depression	rs2895226	C	T	0.393459	0.0451102	0.00815972	3.23154e-08	30.5632
Depression	rs4870063	A	C	0.654196	-0.0534065	0.0083326	1.46154e-10	41.0797
Depression	rs530758485	A	G	0.107085	0.0829902	0.0126283	4.97164e-11	43.1881
Depression	rs57852066	A	G	0.0492467	0.0982292	0.0178809	3.93994e-08	30.1788
Depression	rs62099231	A	G	0.459637	0.0533976	0.00800401	2.53454e-11	44.507
Depression	rs6876567	G	A	0.399705	0.0523901	0.00811811	1.09305e-10	41.6475
Depression	rs7192848	G	A	0.468658	0.0475714	0.00796549	2.34088e-09	35.667
Anxiety	rs10078559	G	T	0.0274903	0.155399	0.0315605	8.48614e-07	24.2442
Anxiety	rs10505912	C	T	0.0752578	0.0962806	0.0190925	4.58638e-07	25.4303
Anxiety	rs114310089	G	C	0.0452698	0.112987	0.0243169	3.37738e-06	21.5894
Anxiety	rs115141628	T	C	0.0132583	-0.217068	0.0473764	4.61073e-06	20.9927
Anxiety	rs115904025	A	G	0.0654747	0.090728	0.0204435	9.0805e-06	19.6957
Anxiety	rs116687155	T	C	0.0102306	0.233223	0.04863	1.61968e-06	23.0003
Anxiety	rs11737891	T	C	0.541307	-0.0459783	0.0103992	9.80957e-06	19.5482
Anxiety	rs117632798	T	A	0.071357	-0.103143	0.0206787	6.10464e-07	24.879
Anxiety	rs117948810	G	C	0.0388	-0.122577	0.0276154	9.0494e-06	19.7022
Anxiety	rs11852540	G	A	0.464542	0.0481584	0.0103796	3.48883e-06	21.527
Anxiety	rs12498967	A	G	0.295946	0.0548138	0.0112698	1.15168e-06	23.6563
Anxiety	rs12614303	T	C	0.466449	-0.050771	0.0104109	1.07877e-06	23.7824
Anxiety	rs13212921	T	C	0.0748369	-0.0928586	0.0203419	4.99735e-06	20.8382
Anxiety	rs139740329	A	C	0.340391	-0.0517068	0.0109739	2.45539e-06	22.201
Anxiety	rs142113669	G	A	0.0118049	0.218984	0.0468447	2.94422e-06	21.8526
Anxiety	rs1447744	C	T	0.222633	-0.0593779	0.0126504	2.68225e-06	22.0314
Anxiety	rs145525394	C	T	0.0779122	-0.111906	0.0199664	2.08627e-08	31.4128
Anxiety	rs147170336	T	C	0.0517693	-0.116734	0.0245421	1.96984e-06	22.6241
Anxiety	rs1480567	C	T	0.261589	0.055191	0.0116925	2.35608e-06	22.2803
Anxiety	rs16848314	C	T	0.380366	-0.0509509	0.0107256	2.0303e-06	22.5663
Anxiety	rs17205528	A	G	0.122118	0.0743385	0.0156442	2.01604e-06	22.5798
Anxiety	rs17435780	G	A	0.0273949	-0.15763	0.034178	3.98722e-06	21.2708
Anxiety	rs17787106	A	T	0.259723	-0.0541578	0.0119047	5.38282e-06	20.6959
Anxiety	rs187372	A	G	0.290525	0.0532558	0.0114672	3.41444e-06	21.5685
Anxiety	rs215890	A	T	0.341958	0.0607008	0.0109052	2.60315e-08	30.9829
Anxiety	rs2251134	C	T	0.361755	-0.0500339	0.0108437	3.94775e-06	21.2899
Anxiety	rs254241	G	A	0.0682789	-0.0944138	0.0212224	8.63575e-06	19.7916
Anxiety	rs2756119	A	G	0.382682	-0.0518895	0.0107446	1.36987e-06	23.3227
Anxiety	rs28478424	G	T	0.112198	0.0758225	0.0162257	2.96845e-06	21.8368
Anxiety	rs374628	C	T	0.526873	0.0490789	0.0104159	2.45397e-06	22.2022
Anxiety	rs4274329	G	A	0.238532	-0.0553216	0.0122646	6.46175e-06	20.3462
Anxiety	rs4382947	A	G	0.417414	-0.049272	0.0105773	3.18845e-06	21.6996
Anxiety	rs4385478	G	A	0.712647	-0.0555031	0.0113774	1.06982e-06	23.7984
Anxiety	rs4430605	G	A	0.538718	-0.0461843	0.0104033	9.02215e-06	19.7082
Anxiety	rs4468	C	T	0.465849	0.0474017	0.0105704	7.31257e-06	20.1097
Anxiety	rs4494021	C	T	0.38616	0.049943	0.010673	2.87727e-06	21.8966
Anxiety	rs4839625	T	C	0.369891	-0.0537216	0.0108169	6.81946e-07	24.6656
Anxiety	rs554005300	A	T	0.0230923	0.154948	0.0341947	5.86084e-06	20.5331
Anxiety	rs56369267	T	G	0.0243084	0.1491	0.0324773	4.41306e-06	21.0764
Anxiety	rs57852066	A	G	0.0491976	0.112651	0.0232152	1.21927e-06	23.5464
Anxiety	rs579450	T	G	0.779491	-0.0584948	0.0124053	2.41346e-06	22.2341
Anxiety	rs58591767	A	G	0.510319	0.0530906	0.0103595	2.97797e-07	26.2638
Anxiety	rs60804291	G	A	0.202505	0.0594907	0.012772	3.19463e-06	21.696
Anxiety	rs61820769	T	C	0.0371971	-0.149589	0.0285497	1.60931e-07	27.4534
Anxiety	rs6450476	G	A	0.712646	0.059135	0.0115557	3.09763e-07	26.1877
Anxiety	rs6497071	G	A	0.270198	-0.0525504	0.0118508	9.23507e-06	19.6633
Anxiety	rs6698895	C	G	0.715183	0.0548964	0.0115456	1.98696e-06	22.6076
Anxiety	rs67133345	T	C	0.278681	0.0558567	0.0114574	1.08725e-06	23.7672
Anxiety	rs6795061	C	T	0.657694	0.0586764	0.0109772	9.02755e-08	28.5722
Anxiety	rs6897252	T	C	0.672069	-0.0503932	0.0110456	5.06011e-06	20.8145
Anxiety	rs7107922	A	C	0.369001	0.0512381	0.0107062	1.7029e-06	22.9042
Anxiety	rs7237747	G	C	0.4493	0.0491456	0.0104283	2.44427e-06	22.2097
Anxiety	rs72723168	T	C	0.0363202	0.127004	0.027296	3.27416e-06	21.6489
Anxiety	rs72859145	G	A	0.0693983	-0.0929426	0.0208422	8.2211e-06	19.8858
Anxiety	rs72967615	T	G	0.0384907	0.117767	0.0265276	9.02049e-06	19.7084
Anxiety	rs7317938	T	C	0.376439	0.0556628	0.0106638	1.79118e-07	27.2462
Anxiety	rs73199970	C	T	0.0219438	-0.169383	0.0372084	5.30689e-06	20.7232
Anxiety	rs73792935	C	G	0.02638	0.156129	0.0315842	7.68228e-07	24.4358
Anxiety	rs743856	C	T	0.136089	0.066615	0.0150131	9.11717e-06	19.6881
Anxiety	rs74868197	A	T	0.0295892	0.134064	0.0299008	7.33888e-06	20.1029
Anxiety	rs76150334	A	G	0.0382324	-0.13588	0.0280779	1.30239e-06	23.4197
Anxiety	rs761719	T	C	0.344373	0.0487731	0.0108429	6.85472e-06	20.2334
Anxiety	rs77493532	A	G	0.0873533	0.0832189	0.0181672	4.63362e-06	20.983
Anxiety	rs77578399	C	T	0.0781436	-0.088123	0.0196596	7.37972e-06	20.0923
Anxiety	rs7842714	A	T	0.600005	0.0476761	0.0107225	8.73434e-06	19.7701
Anxiety	rs79634932	G	C	0.141164	0.0720344	0.0147784	1.09199e-06	23.7588
Anxiety	rs79859523	T	C	0.0776452	-0.0879159	0.0198032	9.01716e-06	19.709
Anxiety	rs9342046	G	C	0.601796	0.0506315	0.0106066	1.80971e-06	22.7871
Anxiety	rs9364756	A	T	0.3566	0.054076	0.0107753	5.20679e-07	25.1855
Anxiety	rs9891146	C	T	0.708573	-0.052758	0.0113256	3.18816e-06	21.6997
Epilepsy	rs10132250	A	C	0.764717	-0.0764825	0.016598	4.06705e-06	21.2331
Epilepsy	rs10179281	A	G	0.408713	0.064597	0.0144121	7.38941e-06	20.0895
Epilepsy	rs10743474	A	C	0.475206	-0.0637873	0.0143183	8.39151e-06	19.8466
Epilepsy	rs111821856	G	A	0.00219785	-1.08868	0.215262	4.24893e-07	25.578
Epilepsy	rs11598336	T	C	0.472914	0.0723355	0.014315	4.3466e-07	25.5341
Epilepsy	rs117288293	C	T	0.0397917	-0.206575	0.038846	1.05024e-07	28.2789
Epilepsy	rs11878760	C	T	0.345356	-0.0679889	0.0150917	6.6359e-06	20.2955
Epilepsy	rs12635851	C	T	0.282168	-0.0790221	0.0159715	7.50931e-07	24.4797
Epilepsy	rs12953429	G	A	0.472425	0.0682335	0.0142261	1.6157e-06	23.0051
Epilepsy	rs13148012	T	C	0.0342863	-0.204841	0.0419618	1.05223e-06	23.8301
Epilepsy	rs149672320	A	G	0.0218808	0.211837	0.0458701	3.87097e-06	21.3277
Epilepsy	rs149895317	T	C	0.0174175	0.227987	0.051039	7.9356e-06	19.9534
Epilepsy	rs150891812	T	C	0.00473652	0.423155	0.0928434	5.17107e-06	20.7729
Epilepsy	rs184369007	T	C	0.0204711	0.213869	0.0478576	7.86357e-06	19.9707
Epilepsy	rs185076690	T	C	0.00670689	-0.485226	0.102639	2.27274e-06	22.3493
Epilepsy	rs1908772	G	T	0.31508	-0.0823558	0.0154726	1.02254e-07	28.331
Epilepsy	rs2538068	A	G	0.243199	0.0843932	0.0164021	2.67135e-07	26.4738
Epilepsy	rs28440931	A	G	0.308447	-0.0685737	0.0155231	9.98367e-06	19.5145
Epilepsy	rs36125258	T	C	0.138463	0.0906814	0.0202726	7.70939e-06	20.0086
Epilepsy	rs55813746	A	G	0.00291378	0.519369	0.114726	5.98177e-06	20.4941
Epilepsy	rs55989371	C	T	0.245853	0.0766829	0.0164428	3.10706e-06	21.7493
Epilepsy	rs62371306	T	C	0.0099716	-0.377533	0.0810661	3.20693e-06	21.6886
Epilepsy	rs6745936	A	G	0.712589	0.0795831	0.0159709	6.2608e-07	24.8304
Epilepsy	rs67672127	C	T	0.224017	-0.0774182	0.0172639	7.3124e-06	20.1098
Epilepsy	rs7536132	C	T	0.851425	0.0928178	0.0209884	9.7636e-06	19.5571
Epilepsy	rs7805419	C	T	0.34176	0.072552	0.0148832	1.08936e-06	23.7633
Epilepsy	rs78563417	C	T	0.00859485	-0.402073	0.0894	6.87702e-06	20.2272
Epilepsy	rs7942330	C	T	0.307639	0.0744096	0.0154245	1.40627e-06	23.2721
Epilepsy	rs79674288	T	A	0.0141003	0.26028	0.0569182	4.81083e-06	20.9112
Epilepsy	rs823072	T	C	0.818293	0.0886024	0.0187668	2.34412e-06	22.29
Insomnia	rs10445632	G	T	0.549038	0.111434	0.0243773	4.84942e-06	20.8961
Insomnia	rs111354704	C	A	0.0182106	0.360632	0.0814586	9.54729e-06	19.5999
Insomnia	rs113566960	C	A	0.00347964	0.769087	0.163213	2.45081e-06	22.2045
Insomnia	rs116385677	A	G	0.071847	-0.23243	0.049967	3.29261e-06	21.638
Insomnia	rs11724306	G	A	0.689942	0.1168	0.0263094	9.01758e-06	19.709
Insomnia	rs118104214	T	C	0.0234495	-0.448944	0.0915813	9.47982e-07	24.0309
Insomnia	rs1402901	G	A	0.0436936	0.29734	0.0537805	3.22485e-08	30.5673
Insomnia	rs17692260	A	G	0.145758	0.149566	0.0331341	6.36283e-06	20.3758
Insomnia	rs189104988	A	G	0.027661	-0.380542	0.0845547	6.77798e-06	20.2549
Insomnia	rs2952019	G	A	0.0171241	-0.586289	0.111342	1.39695e-07	27.7272
Insomnia	rs4946645	G	C	0.148765	0.145626	0.032559	7.72467e-06	20.0049
Insomnia	rs62493587	G	A	0.309648	0.121786	0.025612	1.98408e-06	22.6104
Insomnia	rs72735120	A	C	0.0190725	-0.458226	0.101117	5.85221e-06	20.5358
Insomnia	rs73213085	C	A	0.0284807	0.30395	0.0662793	4.52054e-06	21.0304
Insomnia	rs7623125	T	C	0.0264204	0.402974	0.0758549	1.08171e-07	28.2219
Insomnia	rs8015310	T	C	0.0613637	-0.271817	0.0540654	4.96764e-07	25.2764
Osteoporosis	rs10737462	T	C	0.207269	0.118157	0.0220794	8.72449e-08	28.6381
Osteoporosis	rs10875906	T	C	0.342368	-0.103564	0.0194604	1.02742e-07	28.3214
Osteoporosis	rs112108223	A	G	0.0225902	0.267402	0.0576245	3.47712e-06	21.5335
Osteoporosis	rs112213148	G	A	0.013303	0.335457	0.0706628	2.06153e-06	22.5368
Osteoporosis	rs114061243	C	T	0.00574172	-0.680935	0.15398	9.76855e-06	19.5561
Osteoporosis	rs11634423	T	C	0.718192	-0.0913665	0.0201909	6.03559e-06	20.4768
Osteoporosis	rs11644631	A	G	0.283277	0.103993	0.0199813	1.94527e-07	27.087
Osteoporosis	rs116951016	A	T	0.0065992	-0.635024	0.13838	4.45369e-06	21.0588
Osteoporosis	rs11716316	A	C	0.285104	-0.0915179	0.0205066	8.08761e-06	19.917
Osteoporosis	rs117483179	A	G	0.0264371	0.253064	0.0538315	2.58833e-06	22.0998
Osteoporosis	rs117607053	T	C	0.0556811	-0.19957	0.0422284	2.29013e-06	22.3348
Osteoporosis	rs118042501	T	A	0.0636835	0.169567	0.0360018	2.47759e-06	22.1837
Osteoporosis	rs11972702	T	C	0.263907	0.116123	0.0204548	1.37025e-08	32.2289
Osteoporosis	rs12207382	T	C	0.264572	-0.108548	0.0212686	3.33104e-07	26.0475
Osteoporosis	rs12767752	G	A	0.131325	0.116828	0.0262871	8.818e-06	19.7519
Osteoporosis	rs12941356	G	A	0.535567	0.0852166	0.0183872	3.57676e-06	21.4792
Osteoporosis	rs13430763	C	G	0.0929057	0.143863	0.0305736	2.53314e-06	22.1414
Osteoporosis	rs141356057	T	C	0.0111034	0.36658	0.0798546	4.41998e-06	21.0735
Osteoporosis	rs141472916	T	G	0.00303211	-1.13813	0.232479	9.79896e-07	23.9671
Osteoporosis	rs17754231	T	A	0.483105	0.0821581	0.0182536	6.76597e-06	20.2583
Osteoporosis	rs1963689	C	T	0.241332	-0.112174	0.0217548	2.51918e-07	26.5873
Osteoporosis	rs2353003	G	A	0.237231	0.10217	0.0212123	1.46066e-06	23.1991
Osteoporosis	rs2381914	C	T	0.455923	-0.0842029	0.0185632	5.73271e-06	20.5754
Osteoporosis	rs2610715	T	G	0.713643	-0.0908453	0.0199619	5.34109e-06	20.711
Osteoporosis	rs2836775	C	T	0.226036	-0.108611	0.0223614	1.19149e-06	23.5912
Osteoporosis	rs2894381	A	G	0.196138	-0.135607	0.0235612	8.63635e-09	33.126
Osteoporosis	rs35107139	C	A	0.393633	-0.0850387	0.0188925	6.75725e-06	20.2607
Osteoporosis	rs3779381	G	A	0.243606	-0.0988252	0.0216821	5.16619e-06	20.7746
Osteoporosis	rs3790159	G	A	0.536515	0.0978997	0.0182895	8.66104e-08	28.6523
Osteoporosis	rs3791428	T	C	0.177843	-0.114834	0.0245458	2.89168e-06	21.887
Osteoporosis	rs4305309	C	T	0.743973	0.102436	0.0214125	1.71894e-06	22.886
Osteoporosis	rs466013	G	A	0.546547	-0.0871914	0.0182476	1.76844e-06	22.8316
Osteoporosis	rs4881254	T	C	0.576605	0.0863152	0.018523	3.16381e-06	21.7146
Osteoporosis	rs4970431	G	A	0.934679	-0.178318	0.0351787	4.00092e-07	25.6939
Osteoporosis	rs56324610	C	G	0.284411	-0.0970153	0.0205327	2.30208e-06	22.3248
Osteoporosis	rs6104690	A	G	0.509376	-0.0854848	0.0181932	2.618e-06	22.078
Osteoporosis	rs61638232	C	G	0.122683	0.145267	0.0271434	8.70723e-08	28.6421
Osteoporosis	rs6817223	C	T	0.678411	0.112231	0.0197797	1.3945e-08	32.1948
Osteoporosis	rs6852595	C	T	0.872479	0.13416	0.0284057	2.32397e-06	22.3067
Osteoporosis	rs720300	G	A	0.109884	0.132554	0.028315	2.84885e-06	21.9156
Osteoporosis	rs72868075	T	C	0.0238569	0.255793	0.0551698	3.5443e-06	21.4968
Osteoporosis	rs73128214	C	T	0.102274	0.132366	0.0296621	8.10289e-06	19.9136
Osteoporosis	rs73695729	A	G	0.0419817	-0.220818	0.0477727	3.7956e-06	21.3653
Osteoporosis	rs74374049	A	G	0.0139898	0.325253	0.0725871	7.43413e-06	20.0782
Osteoporosis	rs7516108	C	T	0.686257	-0.0890758	0.0196648	5.9065e-06	20.5183
Osteoporosis	rs75991117	A	G	0.0866618	-0.17431	0.0340084	2.9675e-07	26.2707
Osteoporosis	rs78550104	T	C	0.161823	-0.12395	0.0254541	1.11851e-06	23.7125
Osteoporosis	rs7874896	T	G	0.263109	-0.095674	0.0210342	5.40281e-06	20.6888
Osteoporosis	rs80067004	G	A	0.121694	-0.132869	0.0288198	4.02004e-06	21.2552
Osteoporosis	rs8067054	T	C	0.624824	-0.0869694	0.0187505	3.51382e-06	21.5133
Osteoporosis	rs890634	C	T	0.563058	-0.0832488	0.0184032	6.07981e-06	20.463
Osteoporosis	rs921675	G	A	0.70158	-0.0932767	0.0197674	2.37339e-06	22.2663
Asthma(UKBB)	rs4480384	G	A	0.643257	0.043097	0.00681273	2.51675e-10	40.0177
Asthma(UKBB)	rs12123821	T	C	0.0481732	0.145713	0.0153134	1.81134e-21	90.5427
Asthma(UKBB)	rs10912564	T	C	0.306507	0.0392578	0.00711045	3.36814e-08	30.483
Asthma(UKBB)	rs2988277	T	C	0.398654	-0.0441186	0.00666025	3.49221e-11	43.8796
Asthma(UKBB)	rs35320232	T	C	0.118792	-0.0557751	0.0101299	3.67046e-08	30.3159
Asthma(UKBB)	rs61816766	C	T	0.033244	0.135284	0.0186871	4.50609e-13	52.4094
Asthma(UKBB)	rs78556180	T	G	0.146826	0.0506806	0.00922962	3.99485e-08	30.152
Asthma(UKBB)	rs2296618	G	A	0.135293	-0.0618798	0.0096286	1.30434e-10	41.302
Asthma(UKBB)	rs10178845	A	G	0.294552	-0.0616566	0.00717229	8.21864e-18	73.8998
Asthma(UKBB)	rs34290285	A	G	0.255414	-0.0988716	0.00750984	1.3842e-39	173.333
Asthma(UKBB)	rs7423358	C	T	0.758113	0.0430394	0.00764835	1.83071e-08	31.6663
Asthma(UKBB)	rs72823641	A	T	0.13665	-0.147841	0.00961818	2.56035e-53	236.267
Asthma(UKBB)	rs13099273	T	A	0.507649	-0.0535817	0.00662712	6.20583e-16	65.3707
Asthma(UKBB)	rs1684466	A	G	0.637709	-0.0568948	0.00701248	4.9238e-16	65.8267
Asthma(UKBB)	rs35570272	T	G	0.396277	0.0509447	0.00670108	2.90536e-14	57.7974
Asthma(UKBB)	rs7626218	T	A	0.395198	-0.0413534	0.00667906	5.95937e-10	38.3347
Asthma(UKBB)	rs5743618	A	C	0.225707	-0.0664448	0.00786149	2.86484e-17	71.4352
Asthma(UKBB)	rs17454584	G	A	0.218612	0.0597932	0.00789077	3.51965e-14	57.4202
Asthma(UKBB)	rs7734635	G	A	0.154263	0.0767811	0.00906625	2.47742e-17	71.7221
Asthma(UKBB)	rs1837253	C	T	0.739654	0.108356	0.00748003	1.48594e-47	209.845
Asthma(UKBB)	rs848	C	A	0.817872	-0.0963344	0.00847156	5.79696e-30	129.311
Asthma(UKBB)	rs16903574	G	C	0.0765121	0.0865509	0.0125488	5.30518e-12	47.5706
Asthma(UKBB)	rs10477741	G	T	0.128434	0.074266	0.00979669	3.43637e-14	57.4674
Asthma(UKBB)	rs413214	A	G	0.616158	0.0469332	0.00671099	2.68164e-12	48.9088
Asthma(UKBB)	rs35467801	GT	G	0.274803	-0.0454325	0.00732172	5.46387e-10	38.5041
Asthma(UKBB)	rs76493820	G	C	0.0579568	0.0863742	0.0140655	8.20881e-10	37.7101
Asthma(UKBB)	rs9272226	T	C	0.628207	-0.0897705	0.00946208	2.36865e-21	90.0107
Asthma(UKBB)	rs9273386	C	T	0.588625	0.133835	0.00915469	2.11495e-48	213.723
Asthma(UKBB)	rs2800040	A	G	0.406794	-0.037524	0.00684914	4.28578e-08	30.0155
Asthma(UKBB)	rs802731	G	C	0.270854	0.0479182	0.00733727	6.54184e-11	42.6513
Asthma(UKBB)	rs7770794	A	G	0.285802	0.0415551	0.0072243	8.81211e-09	33.087
Asthma(UKBB)	rs3827780	A	G	0.555099	-0.0368473	0.00656749	2.01683e-08	31.4784
Asthma(UKBB)	rs148639908	AT	A	0.353557	-0.0707346	0.00682025	3.35043e-25	107.563
Asthma(UKBB)	rs9260752	A	G	0.0211877	0.180227	0.0320378	1.85042e-08	31.6457
Asthma(UKBB)	rs35621564	G	A	0.365249	-0.0443909	0.00681856	7.49894e-11	42.3841
Asthma(UKBB)	rs1608555	T	C	0.358532	0.0377471	0.00682176	3.14196e-08	30.6178
Asthma(UKBB)	rs112119265	G	T	0.0596895	-0.0778066	0.0138091	1.75622e-08	31.747
Asthma(UKBB)	rs10486391	G	A	0.410809	-0.0388573	0.00665024	5.12743e-09	34.1406
Asthma(UKBB)	rs4722758	G	C	0.19958	0.0634119	0.00814979	7.20775e-15	60.5409
Asthma(UKBB)	rs4739738	A	G	0.641572	-0.067912	0.00680464	1.85994e-23	99.6054
Asthma(UKBB)	rs4736639	C	G	0.286228	-0.0397258	0.0072377	4.04809e-08	30.1262
Asthma(UKBB)	rs13277355	G	A	0.725959	-0.04056	0.00732646	3.09286e-08	30.6484
Asthma(UKBB)	rs368981	A	G	0.708867	0.0561843	0.0072267	7.57182e-15	60.4435
Asthma(UKBB)	rs200491113	GTAGA	G	0.032041	-0.128778	0.0187364	6.28058e-12	47.2401
Asthma(UKBB)	rs33978241	GT	G	0.247356	0.0640799	0.00796494	8.60796e-16	64.726
Asthma(UKBB)	rs992969	G	A	0.74764	-0.119909	0.0075617	1.24997e-56	251.458
Asthma(UKBB)	rs919826	C	T	0.489954	-0.0357527	0.00654304	4.649e-08	29.8579
Asthma(UKBB)	rs1870140	G	A	0.845758	-0.049794	0.00906558	3.95977e-08	30.1691
Asthma(UKBB)	rs11816044	A	G	0.325637	-0.0473268	0.00698072	1.20476e-11	45.9636
Asthma(UKBB)	rs11567923	CT	C	0.193178	0.0497903	0.00839034	2.95209e-09	35.2152
Asthma(UKBB)	rs113981909	A	G	0.115023	-0.0613974	0.010526	5.44703e-09	34.023
Asthma(UKBB)	rs1444782	A	G	0.423577	-0.095445	0.00660017	2.13698e-47	209.12
Asthma(UKBB)	rs2477923	C	T	0.463296	-0.0361313	0.00656022	3.63672e-08	30.334
Asthma(UKBB)	rs11042902	T	C	0.307493	0.0413305	0.00711112	6.16936e-09	33.7804
Asthma(UKBB)	rs12365699	A	G	0.166687	-0.0535351	0.00879601	1.15555e-09	37.043
Asthma(UKBB)	rs35225972	A	G	0.682812	0.0438135	0.00702312	4.41855e-10	38.9185
Asthma(UKBB)	rs174557	G	A	0.309707	-0.0454741	0.00705517	1.15215e-10	41.5445
Asthma(UKBB)	rs479844	G	A	0.554743	0.0403223	0.00655551	7.70407e-10	37.8336
Asthma(UKBB)	rs7936312	T	G	0.476762	0.0838325	0.00652802	9.54333e-38	164.916
Asthma(UKBB)	rs1689510	C	G	0.340371	0.0556484	0.00688071	6.08555e-16	65.4092
Asthma(UKBB)	rs7961712	A	G	0.849901	0.0564852	0.00917211	7.34971e-10	37.9255
Asthma(UKBB)	rs11178649	T	G	0.407176	-0.0429255	0.00664703	1.06206e-10	41.7038
Asthma(UKBB)	rs3024971	G	T	0.107142	-0.112196	0.0106267	4.67089e-26	111.47
Asthma(UKBB)	rs981625	G	C	0.06495	0.0724725	0.0132157	4.16188e-08	30.0723
Asthma(UKBB)	rs912131	G	A	0.703887	0.0580773	0.00713704	4.03738e-16	66.2181
Asthma(UKBB)	rs28498223	T	C	0.280804	0.0497316	0.00731458	1.05366e-11	46.226
Asthma(UKBB)	rs56375023	A	G	0.237326	0.103455	0.00769319	3.1798e-41	180.838
Asthma(UKBB)	rs4842921	A	G	0.387483	-0.0407093	0.00669088	1.17001e-09	37.0187
Asthma(UKBB)	rs11071559	T	C	0.128023	-0.0846874	0.00976462	4.21308e-18	75.2189
Asthma(UKBB)	rs35441874	A	T	0.247084	-0.0824693	0.00761464	2.47172e-27	117.297
Asthma(UKBB)	rs3785356	T	C	0.29795	0.0563	0.00716317	3.85212e-15	61.7741
Asthma(UKBB)	rs11402155	CT	C	0.288152	-0.0450083	0.00755293	2.53706e-09	35.5103
Asthma(UKBB)	rs112267124	A	G	0.234223	0.0428843	0.00769944	2.55035e-08	31.0226
Asthma(UKBB)	rs2412099	A	G	0.42139	-0.0512979	0.00662702	9.88553e-15	59.9187
Asthma(UKBB)	rs4795401	G	A	0.510615	-0.102554	0.00652498	1.15558e-55	247.028
Asthma(UKBB)	rs12964116	G	A	0.0354621	0.107619	0.0176522	1.08338e-09	37.1689
Asthma(UKBB)	rs117710327	A	C	0.0669584	-0.126406	0.013395	3.84238e-21	89.0533
Asthma(UKBB)	rs117552144	T	C	0.0667517	0.079499	0.0138067	8.51197e-09	33.1546
Asthma(UKBB)	rs11088309	G	C	0.142544	0.0604575	0.00931455	8.54673e-11	42.1286
Asthma(UKBB)	rs12165508	C	T	0.795068	-0.0451442	0.00809156	2.41674e-08	31.1272
Abbreviations: SNP, single nucleotide polymorphism
